33 **Abstract**

34 General anesthesia leads to a loss of consciousness and an unarousable state in patients.  
35 Although general anesthetics are widely used in clinical practice, their underlying  
36 mechanisms remain elusive. The potential involvement of nonneuronal cells is  
37 unknown. Microglia are important immune cells in the central nervous system (CNS)  
38 that play critical roles in CNS function and dysfunction. We unintentionally observed  
39 delayed anesthesia induction and early anesthesia emergence in microglia-depleted  
40 mice. We found that microglial depletion differentially regulates neuronal activities by  
41 suppressing the neuronal network of anesthesia-activated brain regions and activating  
42 emergence-activated brain regions. Thus, microglia facilitate and stabilize the  
43 anesthesia status. This influence is not mediated by dendritic spine plasticity. Instead,  
44 it relies on the activation of microglial P2Y12 and subsequent calcium influx, which  
45 facilitates the general anesthesia response. Together, we elucidate the regulatory role of  
46 microglia in general anesthesia, extending our knowledge of how nonneuronal cells  
47 modulate neuronal activities.

48

49

## 50 **Introduction**

51 General anesthesia is a cornerstone of modern medical sciences. Upon the use of  
52 anesthetics, patients lose consciousness and enter an unarousable state. Although  
53 general anesthetics are widely used in clinical procedures, the mechanism of general  
54 anesthesia remains elusive. Different anesthetics activate or inhibit specific receptors  
55 in neurons, modulating neuronal activities across the entire network. However, the  
56 involvement of nonelectrically active glial cells in anesthesia is poorly understood.  
57 Microglia are yolk sac-derived glial cells in the central nervous system (CNS) (1). They  
58 play critical roles in CNS development, function and dysfunction (2, 3). Previous  
59 studies have found that neuronal activity in the CNS network modulates microglial  
60 activity. Microglia exhibit elevated process motility, extension and territory  
61 surveillance during anesthetization and sleep (4, 5). Suppression of neuronal activity  
62 increases calcium signaling in microglial processes (6). Conversely, microglia also  
63 modulate neuronal activity via multiple mechanisms (7-12). The microglial regulation  
64 of neuronal activities thus raises the question of whether microglia can modulate the  
65 general anesthesia response.

66  
67 Microglial survival relies on colony-stimulating factor 1 receptor (CSF1R) signaling  
68 (13). Pharmacological inhibition of CSF1R efficiently eliminates CNS microglia (14-  
69 19). Previous studies have shown that acute microglial depletion does not induce  
70 neuroinflammation (14, 15, 19, 20). The ablation of microglia in adulthood also does  
71 not result in obvious general behavioral dysfunctions (14, 20), although this finding is  
72 controversial (21). It seems that microglia are disposable under physiological  
73 conditions. However, when we killed microglia with PLX5622, a CSF1R inhibitor (22),  
74 we unintentionally observed robust resistance to anesthetic administration. This  
75 suggests that microglia may facilitate general anesthesia by modulating neuronal  
76 network activity.

77

78 To this end, we first quantified the influence of microglial depletion on the response to  
79 general anesthesia. We utilized the loss of righting reflex (LORR) and recovery of  
80 righting reflex (RORR) to evaluate anesthesia induction and emergence, respectively.  
81 After microglial depletion, mice displayed a longer LORR time and a shorter RORR  
82 time. The dampened general anesthesia response was not dependent on specific  
83 anesthetics or receptors, as this phenomenon was observed with three different agonists  
84 of the GAGA<sub>A</sub> receptor (pentobarbital, propofol and chloral hydrate) and one  
85 antagonist of the NMDA receptor (ketamine). Electroencephalography (EEG) and  
86 electromyography (EMG) findings further confirmed our initial observation. Different  
87 brain regions diversely regulate anesthesia induction and emergence. Anesthesia  
88 induction is positively correlated with anesthesia-activated brain regions (AABRs). In  
89 contrast, anesthesia emergence is positively correlated with emergence-activated brain  
90 regions (EABRs). We observed that microglia modulate brain network activity in a  
91 brain region-specific manner rather than in a universal manner for all brain regions.  
92 Based on c-Fos reactivity and patch clamp recordings, we demonstrated that microglial  
93 depletion inhibits AABRs and activates EABRs. The divergent effects in different brain  
94 regions orchestrate the status during general anesthesia use. Microglia-mediated  
95 anesthesia modulation is not attributed to dendritic spine plasticity. We found that mice  
96 with genetical knockout or pharmacological inhibition of microglial P2Y<sub>12</sub> were more  
97 resistant to general anesthesia. In addition, the contribution of microglial P2Y<sub>12</sub> to  
98 anesthesia response was further confirmed by the mice received microglia replacement,  
99 in which the replaced microglia-like cells are P2Y<sub>12</sub><sup>-</sup> (18). On the other hand, the  
100 intracellular Ca<sup>2+</sup> concentration in microglia facilitates and stabilizes the response to  
101 general anesthesia. Because purinergic activation of P2Y<sub>12</sub> increases intracellular Ca<sup>2+</sup>  
102 (23-25), our results reveal that the general anesthesia response is regulated through  
103 P2Y<sub>12</sub> to Ca<sup>2+</sup> signaling in microglia.

104

105 In conclusion, our study demonstrates a regulatory role of microglia in the response to  
106 general anesthesia and identifies the underlying mechanism of this process. This study  
107 extends our knowledge of how nonelectrically active glial cells regulate the general

108 anesthesia response. It also sheds new light on how microglia contribute to maintaining  
109 the status of the brain network. When we were preparing our manuscript, a paper  
110 discussing a similar topic emerged (26).

111

112

## 113 **Results**

### 114 **Microglia regulate the induction of and emergence from general anesthesia**

115 We unintentionally observed that mice become more resistant to anesthesia after  
116 microglia and macrophage depletion by the CSF1R inhibitor PLX5622. To  
117 quantitatively study whether microglial depletion indeed influences the induction of  
118 and emergence from general anesthesia, we first fed mice a PLX5622-formulated diet  
119 (PLX5622 hereafter) to ablate CNS microglia and peripheral macrophages (16, 18, 19,  
120 27). After 14 days of PLX5622 administration, we intraperitoneally injected  
121 pentobarbital (80 mg pentobarbital sodium per kg of body weight) into the PLX5622-  
122 treated mice (Figure 1A). Compared to naïve mice on day 0 (D0), the PLX5622-treated  
123 mice at D14 displayed a longer time for LORR and shorter time for RORR (Figure 1B).  
124 Pentobarbital is an agonist of the GABA<sub>A</sub> receptor (28). We next examined whether  
125 this microglia- and macrophage-mediated regulation of the anesthesia response is  
126 restricted to pentobarbital or GABA<sub>A</sub> receptor agonists. We assessed LORR and RORR  
127 in PLX5622-treated mice by using other anesthetics, including two other GABA<sub>A</sub>  
128 receptor agonists (propofol, 200 mg/kg of body weight; chloral hydrate, 400 mg/kg of  
129 body weight) (29-31) and one NMDA receptor antagonist (ketamine, 100 mg/kg of  
130 body weight) (32). Similar trends were observed in propofol-, chloral hydrate- and  
131 ketamine-induced LORR and RORR (Figure 1B). To exclude the possibility that  
132 PLX5622-induced anesthesia resistance results from tolerance to repetitive anesthetic  
133 injection, we sequentially treated mice with the same anesthetics 5 times at 7-day  
134 intervals (Figure 2A). Both LORR and RORR were unchanged for pentobarbital,  
135 propofol, chloral hydrate and ketamine, except for chloral hydrate-induced LORR after  
136 D14 (the third dose) (Figure 2B). PLX5622-treated mice exhibited a resistant  
137 phenotype (Figure 1B). In contrast, the third dose of chloral hydrate made mice more  
138 susceptible to anesthesia (Figure 2B), an opposite trend from PLX5622 treatment.  
139 Consequently, PLX5622-induced anesthesia resistance is not attributed to the tolerance  
140 of repetitive anesthetic administration.

141

142 PLX5622 can simultaneously ablate brain microglia and peripheral macrophages (27).  
143 To exclude the possibility that CSF1R-mediated general anesthesia regulation does not  
144 result from peripheral macrophages, we utilized the blood-brain barrier-impermeable  
145 CSF1R inhibitor PLX73086 to ablate peripheral macrophages without influencing  
146 brain microglia (33). After administration of the PLX73086-formulated diet  
147 (PLX73086 hereafter) for 14 days, macrophages in the liver, lung, spleen and kidney  
148 were significantly ablated, while brain microglia were not influenced (Figure 3A-B).  
149 PLX73086-treated mice (peripheral macrophage-depleted, brain microglia-unchanged)  
150 displayed similar general anesthetic responses as CD-treated naïve mice, including  
151 those treated with pentobarbital, propofol, chloral hydrate and ketamine, except for the  
152 RORR in pentobarbital-treated mice (Figure 3C). Since PLX73086-treated mice  
153 (peripheral macrophage-depleted, brain microglia-unchanged) exhibited a delayed  
154 RORR with pentobarbital administration (Figure 3C), whereas PLX5622-treated mice  
155 (peripheral macrophage-depleted, brain microglia-depleted) displayed an earlier RORR  
156 (Figure 1B), the pentobarbital-induced early emergence in PLX5622-administered  
157 mice is not attributed to peripheral macrophage ablation. Therefore, microglial  
158 depletion, rather than macrophage depletion, leads to resistance to general anesthesia.

159  
160 Next, we reasoned whether this anesthesia resistance is permanent or can be reversed  
161 by microglial repopulation. To address this question, we ceased CSF1R inhibition by  
162 treating the microglia-depleted mice with a control diet (CD) for 21 days to allow  
163 microglia to repopulate the brain (Figure 1A), at which point repopulated microglia  
164 recovered to the same density and similar transcriptional characteristics as those in  
165 control mice (19). The LORR and RORR of microglia-repopulated mice at D35  
166 recovered to the same level as those of naïve mice at D0 (Figure 1B), indicating that  
167 fully repopulated microglia can reverse the anesthesia susceptibility of mice.

168  
169 Together, our results indicate that microglial depletion by inhibiting CSF1R results in  
170 delayed anesthesia induction and early anesthesia emergence, making the animals more  
171 resistant to general anesthesia.

172

173 To further characterize the impact of microglial depletion throughout the  
174 anesthetization window, we recorded EEG and EMG signals to monitor the anesthesia  
175 state before and after pentobarbital administration (Figure 4A). Microglial depletion  
176 showed no obvious influence on the EEG in the awake or conscious state before  
177 pentobarbital administration (Figure 4B). In contrast, microglia-depleted mice  
178 exhibited delayed anesthesia induction and early emergence in response to  
179 pentobarbital (Figure 4B-C). In addition, microglial depletion significantly altered the  
180 power spectrum during anesthesia induction and emergence but not consciousness  
181 (Figure 4D). The EMG results showed that muscular activity in the conscious state was  
182 unchanged upon microglial depletion. In contrast, microglia-depleted mice exhibited a  
183 delayed loss and early recovery of muscular activity after pentobarbital injection  
184 (Figure 4E). Moreover, the probability of being in the conscious state, predicted by an  
185 algorithm combining EEG and EMG (34), triple confirmed delayed anesthesia  
186 induction and early emergence after microglial depletion (Figure 4F). Similar results  
187 were also observed for propofol (Figure 5) and ketamine (Figure 6). The EEG and EMG  
188 results demonstrate that microglial depletion impedes the anesthesia process.

189

190 Together, our results demonstrate that brain microglia-depleted mice are resistant to  
191 general anesthetics. In other words, microglia play important roles in facilitating and  
192 stabilizing the status of general anesthesia response.

193

#### 194 **Microglia facilitate the anesthesia response in a brain region-specific manner**

195 A previous study indicated that microglia negatively regulate neuronal activity through  
196 the microglial catabolism of ATP and neuronal adenosine receptor A<sub>1</sub>R. Microglial  
197 depletion enhances neuronal activity in the striatum (12). Different brain regions  
198 regulate anesthesia induction and emergence in diverse manners. If microglial depletion  
199 indiscriminately influences neuronal activities among different brain regions, the  
200 enhanced activities in AABRs and EABRs would be mutually antagonistic,  
201 complicating the anesthetic effect. To investigate whether microglia regulate neuronal

202 activity in an indiscriminate or brain region-specific manner, we examined c-Fos  
203 expression in AABRs and EABRs of CD- and PLX5622-treated mice (Figure 7A). We  
204 first studied AABRs, including the lateral habenula (LHb) (35, 36), supraoptic nucleus  
205 (SON) (37), ventrolateral preoptic nucleus (VLPO) (38) and thalamic reticular nucleus  
206 (TRN) (39). The abundance of c-Fos<sup>+</sup> cells was significantly reduced in the LHb and  
207 SON of microglia-depleted mice (Figure 7B). VLPO exhibited a decreasing trend in the  
208 abundance of c-Fos<sup>+</sup> cells, although it did not reach a statistically significant level ( $P =$   
209 0.1592) (Figure 7B). The abundance of c-Fos<sup>+</sup> cells was unchanged in the TRN (Figure  
210 7B). We next examined EABRs, including the paraventricular thalamus (PVT) (40),  
211 locus coeruleus (LC) (41), lateral hypothalamus (LH) (42, 43) and ventral tegmental  
212 area (VTA) (44, 45). In contrast to a suppressed trend in AABRs, neuronal activity  
213 exhibited an enhanced trend in EABRs. Microglial depletion significantly increased the  
214 c-Fos<sup>+</sup> cell number in the PVT and LC (Figure 7C). c-Fos<sup>+</sup> cell numbers were also  
215 increased in the LH and VTA, although the difference did not reach statistical  
216 significance ( $P = 0.0598$  and  $0.1436$ , respectively) (Figure 7C). To exclude the  
217 possibility that the different c-Fos<sup>+</sup> cell numbers were attributed to animal handling, we  
218 compared c-Fos expression in saline-injected and noninjected mice (Figure 8A). Our  
219 results indicate that animal handling (saline injection) did not influence c-Fos  
220 expression in the LHb, SON, VLPO, TRN, PVT, LC, LH or VTA (Figure 8B-C).  
221 Therefore, we found that microglial depletion negatively regulates AABRs and  
222 positively regulates EABRs, indicating that microglia regulate neuronal activity in a  
223 brain region-specific manner. The suppressed neuronal activity in AABRs leads to  
224 delayed anesthesia induction. In contrast, the elevated neuronal activity in EABRs  
225 results in the early emergence of anesthesia.

226

227 The protein expression of c-Fos is relatively slow, peaking at a timepoint hours after  
228 transcription (46). Mice in our study were quickly sacrificed after deep anesthesia,  
229 typically within 5 to 10 min. The abundance of c-Fos protein seen with immunostaining  
230 reflected neuronal activity during the consciousness stage (Figure 7). In contrast, the  
231 mRNA expression of *Fos* (encoding c-Fos) is relatively fast, peaking at approximately

232 30 min after induction (46). We asked how microglia influence neuronal activity during  
233 the anesthesia stage and whether microglia differentially influence neuronal activity  
234 between the consciousness and anesthesia stages. To this end, we sacrificed microglia-  
235 naïve and microglia-depleted mice 30 min after deep anesthetization by pentobarbital  
236 and simultaneously labeled the c-Fos protein by immunostaining and *Fos* mRNA by  
237 RNAscope (Figure 9A). The c-Fos<sup>+</sup> cells represent activated neurons during the  
238 consciousness stage, while *Fos*<sup>+</sup> cells represent activated neurons during the anesthesia  
239 stage (Figure 9A). We compared the c-Fos<sup>+</sup> and *Fos*<sup>+</sup> cells in AABRs and EABRs in  
240 which neuronal activity was significantly altered in microglia-depleted mice, including  
241 the LHb, SON, PVT and LC (Figure 7B-C and Figure 9B-C). After microglial depletion,  
242 activated neurons in the anesthesia stage (*Fos*<sup>+</sup>) displayed similar trends as those in the  
243 consciousness state (c-Fos<sup>+</sup>) in the LHb, SON and LC (Figure 9B-C). However, the  
244 number of anesthesia-activated neurons (*Fos*<sup>+</sup>) was unchanged between the naïve and  
245 microglia-depleted PVT, whereas the number of consciousness-activated neurons was  
246 significantly increased upon microglial depletion (Figure 9C). Exploiting the c-Fos  
247 protein and *Fos* mRNA dual labeling, we further compared consciousness-activated  
248 anesthesia-activated (c-Fos<sup>+</sup> *Fos*<sup>+</sup>), consciousness-activated anesthesia-nonactivated  
249 (c-Fos<sup>+</sup> *Fos*<sup>-</sup>) and consciousness-nonactivated anesthesia-activated (c-Fos<sup>-</sup> *Fos*<sup>+</sup>)  
250 neurons between naïve and microglia-depleted mice (Figure 9A). In the LHb and SON  
251 of AABRs, consciousness-activated anesthesia-activated (c-Fos<sup>+</sup> *Fos*<sup>+</sup>), consciousness-  
252 activated anesthesia-nonactivated (c-Fos<sup>+</sup> *Fos*<sup>-</sup>) and consciousness-nonactivated  
253 anesthesia-activated (c-Fos<sup>-</sup> *Fos*<sup>+</sup>) cell numbers exhibited a decreasing trend after  
254 microglial depletion (Figure 9B). This indicates that microglial depletion influences  
255 AABR neuronal activity at both the consciousness and anesthesia stages. In the PVT of  
256 the EABR, consciousness-activated anesthesia-nonactivated (c-Fos<sup>+</sup> *Fos*<sup>-</sup>) cell numbers  
257 were significantly increased in microglia-depleted brains, whereas consciousness-  
258 activated anesthesia-activated (c-Fos<sup>+</sup> *Fos*<sup>+</sup>) and consciousness-nonactivated  
259 anesthesia-activated (c-Fos<sup>-</sup> *Fos*<sup>+</sup>) cell numbers were unchanged (Figure 9C). This  
260 indicates that microglial depletion influences PVT neuronal activity at the  
261 consciousness stage but not at the anesthesia stage. In the LC of the EABR, microglial

262 depletion significantly increased the cell numbers of consciousness-activated  
263 anesthesia-activated (c-Fos<sup>+</sup> Fos<sup>+</sup>) and consciousness-activated anesthesia-  
264 nonactivated (c-Fos<sup>+</sup> Fos<sup>-</sup>) neurons (Figure 9C). In contrast, the number of  
265 consciousness-nonactivated anesthesia-activated (c-Fos<sup>-</sup> Fos<sup>+</sup>) cells was not altered  
266 (Figure 9C). This finding indicates that microglial depletion does not influence the LC  
267 neurons that are not activated in the consciousness stages.

268

269 The results indicate that microglia diversely regulate neuronal activity through a  
270 sophisticated brain region-specific manner instead of via indiscriminately negative  
271 feedback control as in the striatum (12). This may be due to microglial heterogeneity,  
272 different neuronal cell types, and/or circuitries in different brain regions.

273

#### 274 **Microglial depletion reduces the E/I ratio in AABR but enhances the E/I ratio in** 275 **EABR**

276 To understand how microglia reshape neuronal activity, we treated mice with CD or  
277 PLX5622 for 14 days and performed whole-cell recordings in neurons of SON and LC  
278 in acute brain slices, representing AABR and EABR with reduced and increased  
279 neuronal activity upon microglial depletion, respectively (Figure 10A). We delivered  
280 electrical pulses (0.1 ms in pulse duration, 10/20 Hz, 8 pulses) with a current intensity  
281 increment of 10  $\mu$ A every 10 seconds to the neighboring tissue (approximately 50  $\mu$ m  
282 from the recorded cell) to induce postsynaptic responses, including both evoked  
283 excitatory postsynaptic currents (eEPSCs) and evoked inhibitory postsynaptic currents  
284 (eIPSCs). In the SON of AABR, higher stimulation currents induced larger amplitudes  
285 of both eEPSCs and eIPSCs (Figure 10B-C). The peak amplitudes of eEPSCs in  
286 microglia-depleted mice were significantly smaller than those in naïve mice, while the  
287 peak amplitudes of eIPSCs showed no significant difference (Figure 10B-C). As shown  
288 in Figure 10C, the excitation received by SON neurons dominated in naïve mice. The  
289 E/I ratio was also significantly decreased after microglial depletion, indicating  
290 decreased neuronal excitability in the SON (Figure 10D). SON neurons with microglia  
291 depletion exhibited a significantly increased paired-pulse ratio (PPR) of eEPSCs, while

292 the eIPSC PPR was similar between naïve and microglia-depleted mice (Figure 10E-  
293 F), indicating a reduction in presynaptic release probability in excitatory synapses.  
294 Microglial depletion thus results in a more inhibitory state in the AABR SON. In the  
295 LC of EABR, the eEPSC amplitudes induced by higher stimulation currents in  
296 microglia-depleted mice were substantially greater than those in naïve mice (Figure  
297 10G-H). In contrast, the eIPSC amplitudes showed no significant difference (Figure  
298 10G-H). In contrast to that in the SON, the E/I ratio in the LC was significantly  
299 enhanced in PLX5622-treated mice (Figure 10I), indicating an increase in the excitation  
300 of LC neurons. Microglial depletion did not change the eEPSC PPR or eIPSC PPR in  
301 the LC (Figure 10J-K), representing an unchanged presynaptic release probability in  
302 both excitatory and inhibitory synapses. Microglial depletion thus results in a more  
303 excitatory state in the EABR LC.

304

305 In conclusion, our results reveal that microglial depletion decreases AABR and  
306 enhances EABR network activities, explaining delayed anesthesia induction and early  
307 emergence.

308

### 309 **Microglia-mediated anesthesia modulation is not attributed to the influence of** 310 **dendritic spines**

311 Microglia play important roles in spine pruning (47, 48). We asked whether microglia-  
312 mediated anesthesia regulation occurs through the alteration of dendritic spines. We  
313 first quantified spine density after microglial depletion for 14 days (Figure 11A). Spine  
314 density in both apical and basal dendrites of layer V pyramidal cells in the medial  
315 prefrontal cortex (mPFC) was not changed in the relatively short period of 14 days  
316 (Figure 11B), when anesthesia induction and emergence were already robustly  
317 influenced (Figure 1). The ratios of spine categories of different shapes were altered in  
318 microglia-depleted mice. In apical dendrites, the percentage of mature mushroom  
319 spines was increased, whereas the percentage of filopodia spines was reduced (Figure  
320 11B). In basal dendrites, mature mushroom spines were increased, while thin and  
321 filopodia spines were decreased (Figure 11B). Thus, short-term microglial depletion for

322 14 days does not alter spine density but changes the percentage of different categories  
323 of spines, even though general anesthesia is dramatically influenced. Next, we ask  
324 whether the altered spine density influences general anesthesia response. Microglia  
325 phagocytose dendritic spines via the C1q “eat me” signal (8, 47, 49). The dendritic  
326 spine is remodeled in C1q-deficient mice with increased density (50). We thus examined  
327 anesthesia induction and emergence in C1qa<sup>-/-</sup> mice (Figure 11C). Even with the  
328 alteration of spine density, the pentobarbital-, propofol- or ketamine-induced LORR  
329 and RORR were not influenced in C1q-deficient mice (Figure 11D). Therefore, our  
330 results reveal that even though microglia contribute to spine plasticity, microglia-  
331 mediated anesthesia modulation does not result from spine pruning.

332

### 333 **Intracellular calcium in microglia regulates the anesthesia response through** 334 **P2Y12 signaling**

335 Microglial P2Y12 is a G protein-coupled receptor (GPCR) that modulates neuronal  
336 activity (11). We thus asked whether microglia-mediated anesthesia modulation is  
337 dependent on P2Y12. To address this question, we utilized the selective P2Y12  
338 antagonist 2-MeSAMP (51) to block P2Y12 signaling by intracranial guide tube  
339 implantation (Figure 12A). Ninety minutes after 2-MeSAMP administration, brain  
340 microglia exhibited a more reactive morphology (Figure 12B), the consequence of  
341 decreased P2Y12 signaling, as shown in previous studies (52). Pharmacological  
342 inhibition of P2Y12 by 2-MeSAMP delayed the LORR and accelerated the RORR of  
343 pentobarbital-induced anesthetization (Figure 12C). To further confirm the function of  
344 microglial P2Y12 in the anesthesia response, we conditionally knocked out P2Y12 in  
345 microglia in CX3CR1<sup>+/-</sup>CreER::P2Y12<sup>fl/fl</sup> mice (Figure 12D). After 4 doses of tamoxifen,  
346 the majority of P2Y12 was successfully knocked out in CX3CR1<sup>+/-</sup>CreER::P2Y12<sup>fl/fl</sup> mice  
347 (Figure 12E). CX3CR1<sup>+/-</sup>CreER::P2Y12<sup>fl/fl</sup> mice exhibited delayed LORR and early  
348 RORR in response to pentobarbital (Figure 12F), echoing the pharmacological  
349 inhibition by 2-MeSAMP. Interestingly, when the conditional knockout of microglial  
350 P2Y12 was induced at a lower efficacy in TMEM119<sup>CreER/CreER</sup>::P2Y12<sup>fl/fl</sup> mice (Figure  
351 12G-H), as the recombinase activity of TMEM119-CreER is lower than that of

352 CX3CR1-CreER (53, 54), TMEM119<sup>CreER/CreER::P2Y12<sup>fl/fl</sup></sup> mice displayed an early  
353 RORR in response to pentobarbital, but the LORR was not affected (Figure 12I). The  
354 results indicate that microglia regulate the anesthesia response through P2Y12 signaling  
355 in a dose-dependent manner.

356

### 357 **The influence of microglia replacement to the general anesthesia**

358 In 2020, we first developed efficient strategies for microglia replacement and proposed  
359 therapeutic applications for neurological disorders (18). Microglia replacement by bone  
360 marrow transplantation (Mr BMT or mrBMT), one of the replacement strategies, can  
361 induce bone marrow cells (BMCs) to differentiate into microglia-like cells and  
362 efficiently replace endogenous microglia in the whole CNS (18, 55). Despite sharing  
363 similar characteristics to endogenous microglia, the replaced cells are P2Y12<sup>-</sup> (Figure  
364 13A-B) as we previously reported (18). We thus reasoned that if microglial P2Y12  
365 indeed influences the response to general anesthesia, Mr BMT-treated mice with  
366 P2Y12<sup>-</sup> microglia should display a dampened response to anesthetics. To this end, we  
367 examined anesthesia induction and emergence in Mr BMT mice (Figure 13A). We  
368 found that Mr BMT mice exhibited delayed LORR and early RORR (Figure 13C),  
369 further echoing the important regulatory role of P2Y12 in the response to general  
370 anesthesia.

371

### 372 **Microglial intracellular calcium regulates general anesthesia**

373 Purinergic activation of P2Y12 increases intracellular Ca<sup>2+</sup> (23-25). We thus reasoned  
374 that the modulation of the anesthesia response is mediated by downstream Ca<sup>2+</sup>  
375 signaling. To this end, we ectopically expressed a chemogenetic receptor in microglia  
376 by CX3CR1<sup>+CreER::hM3Dq-YFP<sup>+/-</sup></sup> (Figure 14A-B). hM3Dq is a modified human M3  
377 muscarinic (hM3) receptor that activates G<sub>αq</sub> upon clozapine-N-oxide (CNO) and in  
378 turn enhances its downstream Ca<sup>2+</sup> concentration (56, 57). When we treated  
379 CX3CR1<sup>+CreER::hM3Dq-YFP<sup>+/-</sup></sup> with CNO to elevate the intracellular Ca<sup>2+</sup> level in  
380 microglia, the LORR to pentobarbital was accelerated, and RORR was delayed (Figure  
381 14C). On the other hand, STIM1 is an endoplasmic reticulum Ca<sup>2+</sup> sensor. The lack of

382 STIM1 results in impaired store-operated  $\text{Ca}^{2+}$  influx (58-60). To specifically disrupt  
383 intracellular  $\text{Ca}^{2+}$  signaling in microglia, we conditionally knocked out STIM1 in  
384 microglia in  $\text{CX3CR1}^{+/CreER}::\text{STIM1}^{\text{fl/fl}}$  mice. After tamoxifen induction, *Stim1* mRNA  
385 was significantly reduced in the  $\text{CX3CR1}^{+/CreER}::\text{STIM1}^{\text{fl/fl}}$  mouse brain (Figure 14D-  
386 E). We found that with impaired  $\text{Ca}^{2+}$  signaling in microglia,  $\text{CX3CR1}^{+/CreER}::\text{STIM1}^{\text{fl/fl}}$   
387 mice displayed delayed anesthesia induction and early emergence (Figure 14F). By  
388 both enhancing and disrupting microglial  $\text{Ca}^{2+}$ , our results reveal that intracellular  $\text{Ca}^{2+}$   
389 in microglia facilitates the anesthesia process.

390

391 Purinergic activation of P2Y12 enhances intracellular  $\text{Ca}^{2+}$  (23-25). Our results thus  
392 indicate that microglia regulate the anesthesia process through P2Y12 and its  
393 downstream  $\text{Ca}^{2+}$  signaling.

394

395

## 396 **Discussion**

### 397 **The mutual interaction between microglia and neurons**

398 Previous studies have indicated that microglia exhibit increased process motility,  
399 extension and territory surveillance during anesthetization and sleep (4, 5). However,  
400 whether and how microglia regulate neuronal activity and contribute to anesthesia  
401 response is largely unknown. Our study demonstrated an active role of microglia in  
402 neuronal activity that facilitate and stabilize the anesthesia response by differentially  
403 changing neuronal activity in the AABRs and EABRs. It relies on microglial P2Y12  
404 and intracellular calcium, rather than the spines plasticity. Microglia and neurons  
405 mutually interact with each other under both physiological and pathological conditions.  
406 Previous studies have indicated that neurons can influence the morphology and function  
407 of microglia through neurotransmitters and/or neuromodulators, such as GABA and  
408 ATP (61, 62). On the other hand, microglia can regulate neuronal activity. Microglia in  
409 the paraventricular nucleus are able to maintain the balance of sympathetic outflow and  
410 suppress the pressor response under hypertensive insults (63). Chemogenetic  
411 manipulations of microglia lead to a prostaglandin-dependent reduction in the  
412 excitability of striatal neurons (64). This evidence reveals that although microglia are  
413 resident immune cells in the brain, their functions are not limited to the immune  
414 response. Our study found that during the process of general anesthesia, microglia serve  
415 as an “anesthesia facilitator and stabilizer” through activating AABRs and inhibiting  
416 EABRs. As a result, microglia-depleted mice are more resistant to general anesthesia.

417

### 418 **Microglial depletion diversely influences neuronal activities in different brain** 419 **regions**

420 Different nuclei are involved in the response to general anesthesia. The influences of  
421 microglial depletion on neuronal activity among these nuclei are different. After  
422 microglial ablation, c-Fos expression is decreased in AABRs but increased in EABRs.  
423 Meanwhile, the electrophysiology results also show that the E/I ratio is differentially  
424 regulated in different brain regions upon microglial depletion. However, the mechanism

425 behind brain region-specific regulation is unclear. Several hypotheses may explain the  
426 microglia-mediated diverse regulations among different brain regions. First, it may be  
427 due to microglial heterogeneity among brain regions. Nonetheless, recent study  
428 indicated that the cross-regional heterogeneity in adulthood was over estimated in  
429 previous studies (65). Second, different neuronal cell types may differentially respond  
430 to microglial depletion. Taking the adenosine receptor as an example. The adenosine  
431 concentration is reduced in the microglia-depleted cortex (66). Interference of P2Y12,  
432 CD39 or CD73 in microglia disrupts the metabolism of extracellular adenosine in the  
433 brain (67). Our results showed that inhibition or knockout of P2Y12 results in resistance  
434 of general anesthesia, indicating that neurons in different brain regions, e.g., the AABRs  
435 and EABRs, differentially respond to adenosine. Moreover, adenosine receptor  
436 subtypes are discriminately distributed across different brain regions (68), suggesting  
437 neurons of different adenosine receptors in the different brain regions may differentially  
438 respond to adenosine. Third, the brain region-specific regulation may also rely on the  
439 neural circuitry. Mutual innervations of the AABRs-EABRs and local circuitries within  
440 specific brain region can result in the diverse neuronal response. The regulation of  
441 neuronal activity is an overall effect that integrated with multiple variables. So does the  
442 microglial contribution to the different brain regions.

443

#### 444 **Molecular mechanisms of how microglia regulate neuronal activity**

445 The C1q-dependent spine pruning by microglia mediates memory forgetting (69). With  
446 increased number of dendritic spines, C1q-deficient mice display enhanced synaptic  
447 connectivity and seizure susceptibility (70). These indicate the importance of C1q in  
448 maintaining the neural function. However, we did not observe the alteration of general  
449 anesthesia response. Moreover, the spine density was not changed upon the short-term  
450 microglial depletion for 14 days. Consequently, our results indicate the microglia-  
451 mediated regulation of anesthesia response does not result from dendritic spine. In  
452 striatum, microglia serve as a brake suppressing neuronal activity (12). P2Y12  
453 knockout in microglia augments the epilepsy susceptible (71, 72). These evidences  
454 indicate that P2Y12 signaling is critical to the stability of neuronal network. However,

455 when we compared neuronal activities by c-Fos staining and patch clamp recording  
456 between the AABRs and EABRs, we observed different consequences to the microglial  
457 depletion. With suppressed neuronal activity in AABRs and enhanced neuronal activity  
458 in EABRs, microglial depletion results in delayed anesthesia induction and early  
459 emergence. Our results also indicate that microglia sophisticatedly and diversely  
460 contribute to orchestrating the CNS function, rather than play an indiscriminate role of  
461 negative feedback control as they do in the striatum (12). Notably, P2Y12 is down  
462 regulated in several neurological disorders (73). The consequences of P2Y12  
463 downregulation in neurological disorders are largely unknown. It would be a potential  
464 therapeutic target to harness neurological disorders.

465

#### 466 **Microglia replacement and general anesthesia**

467 In 2020, we first developed three strategies to achieve efficient microglia replacement  
468 (18), including Mr BMT (18, 55), microglia replacement by peripheral blood (Mr PB  
469 or mrPB) (18, 74) and microglia replacement by microglia transplantation (Mr MT or  
470 mrMT) (18, 75). We discussed a potential application for treating Alzheimer's disease  
471 (AD) by replacing microglia deficient in TREM2, which is one of the major risk factors  
472 in sporadic AD (76-84), with TREM2-normal microglia (18, 85, 86). Recent studies  
473 verified this therapeutic effect of Mr BMT in an AD mouse model (87, 88),  
474 demonstrating the clinical potential of microglia replacement. It also provides new and  
475 clinically feasible strategies for treating other neurological disorders (18, 85, 86, 89).  
476 Despite sharing similar characteristics with naïve microglia, Mr BMT cells are P2Y12<sup>-</sup>  
477 (18). Whether P2Y12<sup>-</sup> microglia-like Mr BMT cells influence the response to general  
478 anesthesia is unknown. To this end, we tested the response to general anesthesia use in  
479 mice treated with Mr BMT and found delayed anesthesia induction and early emergence.  
480 This study not only demonstrates the role of P2Y12 signaling in regulating the response  
481 to general anesthesia but also identifies an impeded general anesthesia response after  
482 Mr BMT treatment.

483

#### 484 **Optogenetic and chemogenetic manipulations in neuronal and nonneuronal cells**

485 The “activation” and “inhibition” of neurons are defined as the electrical activities (e.g.,  
486 action potentials) by which neurons convey information and signals. Optogenetics and  
487 chemogenetics are powerful tools widely used in manipulating neuronal electrical  
488 activity to dissect neural circuitries. Optogenetics relies on light-sensitive ion channels,  
489 pumps or enzymes. Channelrhodopsin-2 (ChR2) is an excitatory optogenetic tool of  
490 light-sensitive cation channels from green algae (90). Ectopically expressed ChR2 in  
491 neurons responds to blue light and undergoes a conformational change, which allows  
492 the passive diffusion of  $\text{Na}^+$ ,  $\text{Ca}^{2+}$ ,  $\text{H}^+$  and  $\text{K}^+$ . It thus depolarizes the membrane potential  
493 and elicits action potentials in neurons (91, 92). Halorhodopsin (NpHR) is an inhibitory  
494 optogenetic tool of archaeal light-driven chloride pumps. In response to yellow light,  
495 the ectopically expressed NpHR in neurons actively pumps  $\text{Cl}^-$  into cells and  
496 hyperpolarizes the membrane potential (93). Chemogenetic tools are based on designer  
497 receptors exclusively activated by designer drugs (DREADDs) (56). hM3Dq is an  
498 excitatory chemogenetic tool of genetically encoded tetracycline-sensitive G protein-  
499 coupled receptor (GPCR) (94). hM3Dq responds to CNO and activates intracellular  $G_{\alpha q}$ .  
500 Then, the elevated  $G_{\alpha q}$  level enhances the intracellular  $\text{Ca}^{2+}$  concentration, thereby  
501 inducing action potentials in neurons. hM4Di is an inhibitory chemogenetic tool (95).  
502 hM4Di responds to CNO and engages the  $G_{\alpha i}$  signaling pathway.  $G_{\alpha i}$  in neurons reduces  
503 intracellular  $\text{Ca}^{2+}$  (suppressing presynaptic transmitter release) and opens  $\text{K}^+$  channels  
504 (hyperpolarizing the membrane potential). Thus, the intracellular consequences from  
505 optogenetic and chemogenetic manipulations can drive or suppress action potentials in  
506 neurons, thus “activating” or “inhibiting” the neuron.

507

508 In contrast, the nonelectrically excitable cells, including microglia, have no action  
509 potentials. The “activation” (or reactive state) and “inhibition” are not defined as  
510 electrical activities. Instead, “activation” (or reactive state) and “inhibition” are defined  
511 as responses to specific stimuli in diverse contexts in which nonneuronal cells  
512 experience sophisticated alterations. The intracellular events of optogenetic and  
513 chemogenetic tools are not directly associated with nonneuronal cell activation. Thus,  
514 optogenetic and chemogenetic tools do not simply “activate” or “inhibit” nonneuronal

515 cells in the brain. In our study, we ectopically expressed hM3Dq in microglia. Upon  
516 CNO administration, hM3Dq elevates intracellular  $\text{Ca}^{2+}$  levels. It does not result in  
517 action potentials in microglia and thus does not “activate” microglia. Nonetheless, it is  
518 a reliable chemogenetic tool for manipulating the  $\text{Ca}^{2+}$  level in microglia. We used this  
519 approach to investigate the biological function of microglial  $\text{Ca}^{2+}$  in the response to  
520 general anesthesia. Together, optogenetic and chemogenetic tools do not simply  
521 “activate” or “inhibit” nonneuronal cells. Instead, they can be utilized to study the  
522 function of nonneuronal cells regarding specific intracellular events.

523

524

## 525 **Methods**

### 526 **Animals**

527 C57BL/6J mice were purchased from SPF (Beijing) Vital River Laboratory Animal  
528 Technology. P2Y12<sup>fl/fl</sup> mice (72) were donated by Prof. Jiyun Peng at Nanchang  
529 University. TMEM119-CreER mice (C57BL/6-Tmem119<sup>em1(cre/ERT2)Gfng/J</sup>, Stock #: 031820) (96), CX3CR1-CreER mice (B6.129P2(C)-Cx3cr1<sup>tm2.1(cre/ERT2)Jung/J</sup>, Stock#: 020940) (97), C1qa<sup>-/-</sup> mice (B6(Cg)-C1qa<sup>tm1d(EUCOMM)Wtsi/TennJ</sup>, Stock#: 31675) (98),  
532  $\beta$ -actin-GFP mice (C57BL/6-Tg(CAG-EGFP)131Osb/LeySopJ, Stock#: 006567) (99)  
533 and LSL-hM3Dq-YFP mice (B6N;129-Tg(CAG-CHRM3\*, -mCitrine)1Ute/J, Stock#: 026220) (100) were purchased from Jackson Lab. STIM1<sup>fl/fl</sup> mice (C57BL/6JGpt-Stim1<sup>em1CfloX/Gpt</sup>, Stock#: T013158) were purchased from GemPharmatech. All mice  
534 were housed in the Animal Facility at the Department of Laboratory Animal Science at  
535 Fudan University under a 12-hour light/dark cycle with food and water given *ad libitum*.  
536 All animal experiments were conducted in accordance with the guidelines of the  
537 Institutional Animal Care and Use Committee of the Department of Laboratory Animal  
538 Science at Fudan University.

541

### 542 **Chemicals and reagents**

543 PLX5622 was formulated into the AIN-76A diet at a concentration of 1.2 g of PLX5622  
544 per kilogram of diet by SYSE Bio (Cat#: D20010801). PLX73086 (Plexxikon) was  
545 formulated into the AIN-76A diet at 0.2 g of PLX73086 per kilogram of diet by  
546 Research Diet, Inc. (Cat#: D15180708i). The normal AIN-76A diet (control diet, CD)  
547 was purchased from SYSE Bio (Cat#: PD1001). Chloral hydrate (Cat#: C104202) and  
548 tamoxifen (Cat#: T137974) were purchased from Aladdin. The P2Y12 inhibitor 2-  
549 MeSAMP (Cat#: HY-125989) and the DREADD agonist CNO (Cat#: HY-17366) were  
550 purchased from MCE. Xylazine hydrochloride (Cat#: X1251) were purchased from  
551 Sigma-Aldrich. Propofol (H20123318) was purchased from Xi'an Libang  
552 Pharmaceutical. Ketamine (H20193336) was purchased from Shanghai Pharmaceutical.  
553 Isoflurane (Lot#: 20230501) was purchased from RWD.

554

### 555 **Drug administration**

556 To pharmacologically ablate myeloid cells, mice were administered a PLX5622-  
557 formulated AIN-76A diet (1.2 g PLX5622 per kilogram of diet, formulated by SYSE  
558 Bio) *ad libitum* for 14 days. To pharmacologically ablate peripheral macrophages, mice  
559 were administered a PLX73086-formulated AIN-76A diet (0.2 g PLX73086 per  
560 kilogram of diet, formulated by Research Diet) *ad libitum* for 14 days. Control mice  
561 were fed an AIN-76A control diet (CD). Since the microglial ablation efficiency by  
562 CSF1R inhibition might be different between sexes (101), we utilized male mice for  
563 this experiment. To efficiently induce CreER-dependent recombination, tamoxifen (150  
564 mg per kg of body weight) dissolved in olive oil (Macklin, 0815210) was administered  
565 via oral gavage for 4 consecutive days following our previously described procedures  
566 (15-19). 2-MeSAMP (10 mM) was injected into the lateral ventricle 90 min before the  
567 behavior test (52). CNO (100 µg/mL) was administered via intraperitoneal injection 90  
568 min before the behavior test (102).

569

### 570 **Righting reflex**

571 First, the mice were placed in a box for 5 min for adaptation to the experimental  
572 environment. Next, anesthesia was initiated, and the righting reflex of the mice was  
573 checked every 15 s from the beginning of anesthesia. When the mice were in an  
574 abnormal position (limbs up) and could not voluntarily return to the normal position,  
575 this behavior was defined as the LORR. The mouse was kept in a position with its back  
576 touching the ground and limbs facing upward during deep anesthesia. A thermostatic  
577 heating pad (37 °C) was placed under the body to maintain body temperature. If the  
578 mouse automatically returned to the normal position (all limbs touching the ground)  
579 from the position where the righting reflex disappeared, it was considered to have  
580 recovered. The time from the end of anesthesia to RORR was defined as the time of  
581 emergence from anesthesia. All experiments were conducted between 20:00 and 4:00  
582 the next day, in the same light-dark cycle of ZT 12:00 to 20:00.

583

584 **Brain tissue preparation**

585 Mice were deeply anesthetized with a mixture of ketamine hydrochloride (100 mg per  
586 kg of body weight) and xylazine (10 mg per kg of body weight) by intraperitoneal  
587 injection. For histological experiments, animals were sequentially transcranially  
588 perfused with 0.01 M PBS and 4% paraformaldehyde (PFA) (Biosharp, Cat#: BL539A)  
589 in 0.01 M PBS. Brains were then carefully harvested and postfixed in 4% PFA in 0.01  
590 MPBS at 4 °C overnight.

591

592 **Cryosection preparation**

593 Brains and peripheral organs were dehydrated in 30% sucrose in 0.01 M PBS at 4 °C  
594 for 3 days. After being embedded in optimal cutting temperature compound (OCT,  
595 SAKURA, Cat#: 4583), brain and peripheral organ samples were frozen and stored at  
596 -80 °C before sectioning. Tissue with regions of interest was cut by a cryostat (Leica,  
597 CM1950) at a thickness of 35 µm.

598

599 **Immunohistochemistry and image acquisition**

600 Brain and peripheral organ sections were rinsed with 0.01 M PBS 3 times for 10 to 15  
601 min, followed by blocking with 4% normal donkey serum (NDS, Jackson, Cat#: 017-  
602 000-121) in 0.01 M PBS containing 0.3% Triton X-100 (Aladdin, Cat#: T109026)  
603 (PBST) at room temperature (RT) for 2 hours. Then, the samples were incubated with  
604 primary antibodies with 1% NDS in PBST at 4 °C overnight. After rinsing with PBST  
605 for 3 changes, the samples were incubated with fluorescent dye-conjugated secondary  
606 antibodies with 1% NDS in PBST with 4',6-diamidino-2-phenylindole (DAPI, 1:1000,  
607 Sigma-Aldrich, D9542) at RT for 2 hours. Afterward, the samples were rinsed three  
608 times before mounting with anti-fade mounting medium (SouthernBiotech, Cat#: 0100-  
609 01).

610

611 Primary antibodies included rabbit anti-IBA1 (1:500, Wako, Cat#: 019-19741, Lot:  
612 CAJ3125), goat anti-IBA1 (1:500, Abcam, Cat#: ab5076, Lot: GR3425808-1), rabbit  
613 anti-GFP (1:1000, Invitrogen, Cat#: A11122, Lot: 2273763), rabbit anti-c-Fos (1:1000,

614 Abcam, Cat#: ab190289, Lot: GR3367372-1), and rabbit anti-P2Y12 (1:500, Sigma-  
615 Aldrich, Cat#: S5768, Lot: 0000128079). Secondary antibodies included AF488  
616 donkey anti-rabbit (1:1000, Jackson, Cat#: 711-545-152, Lot: 161527), AF568 donkey  
617 anti-rabbit (1:1000, Invitrogen, A10042, Lot: 2433862), AF568 donkey anti-goat  
618 (1:1000, Invitrogen, Cat#: A11057, Lot: 2160061), and AF647 donkey anti-goat  
619 (1:1000, Jackson, Cat#: 705-605-003, Lot: 147708).

620

621 Confocal images were acquired by using an Olympus FV3000 confocal microscope  
622 with a solid-state laser. Lasers with wavelengths of 405 nm, 488 nm, 561 nm and 640  
623 nm were used to excite the fluorophores. 60X (oil), 40X (oil) and 20X objectives were  
624 utilized. Some whole brain fluorescence images were acquired by an Olympus VS120  
625 microscope equipped with a motorized stage. 10X objective was used. Z stacked focal  
626 planes were acquired and maximally projected with Fiji. The brightness and contrast of  
627 the image were adjusted with Fiji if necessary.

628

### 629 **c-Fos immunostaining and *Fos* RNAscope dual labeling**

630 Mice were fed a CD or PLX5622 for 14 days and placed alone in a quiet environment  
631 for 2 h, and samples were taken 30 min after intraperitoneal injection of pentobarbital  
632 sodium (80 mg/kg BW). Cryostat sections at 15  $\mu$ m were collected, and hybridizations  
633 were carried out according to the manufacturer's instructions using RNAscope  
634 Multiplex Fluorescent Detection Reagents V2 (Advanced Cell Diagnostics, Cat#:  
635 323110, Lot: 2015636, 2019446). Briefly, sections were dehydrated in sequential  
636 incubations with ethanol, followed by 30 min Protease Plus treatment and RNAscope  
637 wash buffer wash. Mouse *Fos* probe (Cat#: 316921, Lot: 221048) was incubated for 2  
638 h at 40 °C, followed by three amplification steps. After all these steps, general  
639 immunostaining steps were performed as aforementioned.

640

### 641 **EEG/EMG surgery and recording**

642 The mice were initially anesthetized by 2% isoflurane and maintained under anesthesia  
643 by 1% isoflurane during the surgery. Body temperature was monitored in real time and

644 kept at approximately 37 °C throughout the surgical procedure. For the EEG/EMG  
645 recording experiment, two stainless steel screws were placed on the prefrontal cortex  
646 (recording site) and cerebellar cortex (reference site) as EEG electrodes, and two other  
647 thin stainless-steel wires were inserted into the bilateral neck muscles as EMG  
648 electrodes.

649 Mice were allowed a minimum of 7 days of recovery following surgery. On the day of  
650 recording, the mice were acclimated first for 20 min in a recording box, where the  
651 temperature was kept at 25 °C, and the mice were allowed to move around freely. All  
652 recordings were conducted between 20:00 and 24:00. Signals were amplified (Apollo I,  
653 Bio-Signal Technologies, USA) and digitized at a sampling rate of 1000 Hz.

654

### 655 **EEG spectra analysis**

656 The raw EEG signals were down sampled to 250 Hz before analysis. The power  
657 spectrum was computed using multitaper methods in the MATLAB Chronux toolbox  
658 (version 2.1.2, <http://chronux.org/>), with 4 s data segments and 3-5 tapers ( $TW = 3$ ,  $K$   
659  $= 5$ ). To normalize total power and to compare between groups, the power spectra were  
660 normalized such that the total area under the spectra was unity (e.g., power spectral  
661 density). Power spectral density analysis was performed on the data from the baseline  
662 (20 min before injection), induction (slow oscillation appears for the first time and lasts  
663 for more than 30 s after injection) and emergence (slow oscillation disappears for the  
664 first time and lasts for more than 10 min after deep anesthesia) periods.

665 The time-frequency power spectrum (by the “cwt” function in the MATLAB wavelet  
666 toolbox) was also computed using 80 Hz down sampled EEG to enhance the temporal  
667 resolution.

668

### 669 **Root mean square of EMG**

670 The raw EMGs were further down sampled to 25 Hz. The root mean square (RMS) was  
671 obtained using a 20 s moving window.

672

### 673 **Consciousness probability**

674 The vigilance states before and after injection of anesthetic were automatically  
675 classified as *awake* and *nonawake* states by using artificial intelligence (AI)-driven  
676 software Lunion Stage (<https://www.luniondata.com>, Shanghai, China) and were  
677 checked manually (34). The awake probability was generated by 1,000 repeat bootstrap  
678 analyses, e.g., for each repeat, we randomly selected 75% of the total animal data to  
679 calculate the percentage of animals in the awake state at each time point. Any epochs  
680 considered to contain significant movement artifacts were omitted from the data  
681 analysis.

682

### 683 **Intracranial guide tube implantation and microinjection**

684 Briefly, mice were anesthetized with 3% isoflurane (RWD, Lot: 20230501) delivered  
685 in 100% O<sub>2</sub> and then transferred to a stereotaxic frame with a mouse anesthesia mask  
686 (RWD, China). The delivered isoflurane concentration was decreased to 1.5%. A  
687 thermostatic heating pad (37 °C) was placed under the mouse to maintain body  
688 temperature. Unilateral lateral ventricle cannulas were implanted in targeted  
689 coordinates (anteroposterior: -0.5 mm; mediolateral: 1 mm; dorsoventral: -2.3 mm) in  
690 8-week-old mice (103, 104). After a 7-day recovery from surgery, 5 μL of 2-MeSAMP  
691 (10 mM) was injected via the guide cannula using a microsyringe pump at a rate of 0.5  
692 μL/min according to the manufacturer's instructions. Behavioral tests were performed  
693 90 min after the intraventricular injection.

694

### 695 **Microglia replacement by bone marrow transplantation (Mr BMT)**

696 Two approaches were used to achieve myeloid ablation/inhibition of Mr BMT in this  
697 study. For Mr BMT by irradiation, 8-week-old recipient mice were fed PLX5622 from  
698 day 0 to day 14. Then, the pretreated mice were exposed to 9 Gy X-ray irradiation on  
699 day 14 (18, 55). For Mr BMT by busulfan, 8-week-old recipient mice were fed  
700 PLX5622 from day 0 to day 14. Then, the mice received busulfan (25 mg/kg of body  
701 weight for each day) from day 9 to day 12 by intraperitoneal injection. Afterward, 1 ×  
702 10<sup>7</sup> bone marrow cells harvested from the tibia and femur of the β-actin-GFP donor  
703 mouse were immediately introduced into the recipient mice on day 14 via intravenous

704 injection. Then, the mice were fed a control diet. The mouse was fed neomycin (1.1 g/L)  
705 in acidic water (pH 2-3) throughout the procedure of microglia replacement.

706

### 707 **Acute brain slice preparation for patch clamp recording and spine quantification**

708 Parasagittal slices containing the LC, SON and mPFC were obtained from mice aged  
709 from postnatal day 60 (P60) to P70. Mice were deeply anesthetized with pentobarbital  
710 sodium (80 mg/kg of body weight) before sacrifice by decapitation. The brain was  
711 quickly removed and immersed in ice-cold sucrose-based ACSF (10 mM glucose, 213  
712 mM sucrose, 26 mM NaHCO<sub>3</sub>, 1.25 mM NaH<sub>2</sub>PO<sub>4</sub>, 2.5 mM KCl, 2 mM MgSO<sub>4</sub>, 2 mM  
713 CaCl<sub>2</sub>). Acute brain slices with a thickness of 300 μm were cut in sucrose-based ACSF  
714 by a vibratome (Leica VT 1200S). Afterward, brain slices were immediately transferred  
715 to an incubation chamber filled with 95% O<sub>2</sub> and 5% CO<sub>2</sub> equilibrated normal ACSF  
716 (25 mM glucose, 126 mM NaCl, 26 mM NaHCO<sub>3</sub>, 1.25 mM NaH<sub>2</sub>PO<sub>4</sub>, 2.5 mM KCl,  
717 2 mM MgSO<sub>4</sub> and 2 mM CaCl<sub>2</sub>) at 34 °C for 45 min. Slices were then transferred to  
718 95% O<sub>2</sub> and 5% CO<sub>2</sub> equilibrated normal ACSF at room temperature before recording.  
719 Slices were then transferred to a recording chamber continuously perfused in 95% O<sub>2</sub>  
720 and 5% CO<sub>2</sub> equilibrated normal ACSF (approximately 60 mL/h) with the temperature  
721 maintained at 34 ± 1 °C. An infrared-differential interference contrast (IR-DIC)  
722 microscope (Olympus BX-51WI) was used for visualization of individual neurons.

723

### 724 **Patch clamp recording**

725 The intracellular solutions contained 138 mM CsCH<sub>3</sub>SO<sub>3</sub>, 3 mM CsCl, 2 mM MgCl<sub>2</sub>,  
726 0.2 mM EGTA, 10 mM HEPES, 2 mM ATP-Na<sub>2</sub> and 5 mM QX314. The pH was  
727 appropriately adjusted to 7.3 by CsOH, and osmolarity was adjusted to 280-290 mOsm.  
728 The electrode impedance was approximately 4 to 7 MΩ. When recording the evoked  
729 EPSCs (eEPSCs), the membrane potential was held at -70 mV. After eEPSC recording,  
730 the same cell was held at 0 mV to record evoked IPSCs (eIPSCs). The locations of SON  
731 and LC were identified under an IR-DIC microscope based on their location and cell  
732 density. The stimulating electrode was placed deep inside the nucleus and  
733 approximately 50 μm from the recorded cell. Membrane voltage and current were

734 sampled at 10-25 kHz and low-pass filtered at 2-10 kHz using the patch clamp amplifier  
735 MultiClamp 700B (Molecular Devices, LLC), digitized and sampled by Micro 1401  
736 with Spike2 software (Cambridge Electronic Design) or by Digidata 1440A with  
737 pCLAMP 10.2 software (Molecular Devices, LLC). The evoked postsynaptic currents  
738 were analyzed by MATLAB R2023a (MathWorks) and OriginPro9.1 (Originlab, Inc.).

739

#### 740 **Biocytin filling and morphological reconstruction**

741 Coronal sections containing the mPFC, SON and LC were recorded using patch clamp  
742 under a whole-cell configuration. The electrode was filled with the patch solution with  
743 0.2% biocytin (Life Technologies, B1592). Neurons that maintained a stable membrane  
744 potential for at least 20 min were included. Upon cessation of filling, the pipette was  
745 slowly pulled out along the direction of recording until a membrane reseal was formed.  
746 After a 10 min recovery, the slices were fixed in 4% paraformaldehyde overnight at  
747 4 °C, cryoprotected in 30% sucrose solution (for 1 to 3 days) and incubated with AF488  
748 streptavidin (1:1000, Invitrogen, Cat#: S11223, 2390711) in PBS containing 0.3%  
749 Triton X-100 (Aladdin, T109026) overnight at 4 °C. To reconstruct the dendritic spines,  
750 the coronal sections were resected at 70 µm thickness and coverslipped with the  
751 mounting medium Fluoromount-G (Southern Biotechnology Associates). The images  
752 were taken using an Olympus FV3000 confocal microscope equipped with a  
753 UPLSAPO 60X oil-immersion lens (numerical aperture of 1.5). The 2048 × 2048 pixels  
754 frame size was used without zooming. Serial Z-stack images with a step size of 0.7 µm  
755 were collected. Dendritic segments located 30 µm away from the soma and 50 µm in  
756 length were selected for analysis of spine density and category. For individual cells, 8  
757 to 12 dendritic segments were chosen for analysis. Dendritic length and spines were  
758 counted and categorized with ImageJ (NIH). Spines were classified into three subtypes:  
759 thin, mushroom, and stubby based on previously described criteria (105). Briefly, thin  
760 spines included a head-to-neck diameter ratio less than 1.1 and a length-to-spine head  
761 ratio greater than 2.0. Mushroom spines had a head diameter larger than 0.5 µm and a  
762 head-to-neck diameter ratio greater than 1.1. Stubby spines had no clear border between

763 the head and the attachment to the shaft. Filopodia had a long thin protrusion but  
764 without a clear head shape.

765

### 766 **RNA extraction and qPCR**

767 Total RNA from brain tissue was extracted with TRIzol. cDNA was reverse transcribed  
768 from total RNA using the Vazyme HIScript III RT SuperMix for qPCR kit according to  
769 the manufacturer's instructions. Subsequently, a 20  $\mu$ L reaction system was prepared  
770 for qPCR using Vazyme ChamQ Universal SYBR qPCR Master Mix kit with an ABI  
771 StepOne Plus Real-Time PCR system. The relative cDNA concentrations of target  
772 genes were normalized to *Gapdh*. The primers used in this study were synthesized by  
773 Tsingke Biotechnology, including:

774 *Gapdh*-forward (TGAGGCCGGTGCTGAGTATG),

775 *Gapdh*-reverse (TGGTTCACACCCATCACAAACA),

776 *Stim1*-forward (CAGGTTTCAGTGAGACCCTGTC),

777 *Stim1*-reverse (GCCACCAAGATCTCCACAA).

778

### 779 **Statistics and reproducibility**

780 The statistical approaches are indicated in the figure legends. For the righting reflex  
781 test, block randomization was performed on cages of mice such that an approximate  
782 number of mice per cage were assigned to each experimental group. Collection of  
783 behavior experiment data was double blinded. c-Fos<sup>+</sup>/*Fos*<sup>+</sup> cell counting and spine  
784 morphology analysis were evaluated independently by two blinded experienced  
785 researchers by Fiji. No statistical methods were used to predetermine sample sizes, but  
786 our sample sizes were similar to those reported in our previous publications (15-19,  
787 106). The data distribution was assumed to be normal, but this assumption was not  
788 formally tested. No data were excluded from the analyses. Data are shown as the mean  
789  $\pm$  SD or mean  $\pm$  SEM as specifically identified. The two-tailed unpaired t test, paired t  
790 test and one-way or two-way repeated measures (RM) ANOVA followed by  
791 Bonferroni's multiple comparisons test were used to assess statistical significance based  
792 on GraphPad Prism 9.0 and MATLAB 2020b if necessary. Significance was defined as

793  $P < 0.05$ . The layout of all of the figures was generated by Adobe Illustrator.

794

795

796 **Acknowledgements**

797 The authors thank Lize Xiong (Shanghai Fourth People's Hospital, School of Medicine,  
798 Tongji University), Weifeng Yu (Renji Hospital, Shanghai Jiao Tong University), Zhian  
799 Hu (Army Medical University), Ji Hu (ShanghaiTech University), Zhe Zhang and  
800 Huateng Cao (Institute of Neuroscience, Chinese Academy of Sciences) and for the  
801 advice in this study, Jiyun Peng (Nanchang University) for donating the P2Y12<sup>fl/fl</sup> mice.  
802 This study was supported by STI2030-Major Projects (2022ZD0204700) (B.P.),  
803 (2022ZD0207200) (Y.R.) and (2021ZD0202500) (Y.S.), National Natural Science  
804 Foundation of China (32170958) (B.P.), (32000678) (Y.R.), (32130044, T2241002)  
805 (Y.S.), (32100930) (Q.H.) and (32200953)(W.K.), “Shuguang Program” supported by  
806 Shanghai Education Development Foundation and Shanghai Municipal Education  
807 Commission (22SG07) (B.P.), Program of Shanghai Academic/Technology Research  
808 Leader (21XD1420400) (B.P.), Shanghai Pilot Program for Basic Research (21TQ014)  
809 (B.P.), The Innovative Research Team of High-Level Local University in Shanghai  
810 (B.P.), Shanghai Municipal Science and Technology Major Project (2018SHZDZX01)  
811 (Y.M.), and ZJ Lab (Y.M.).

812

813

814 **Author contributions**

815 B.P. accidentally observed an anesthetic-resistant phenotype in microglia-depleted mice  
816 in 2015. B.P., Y.H. and Y.S. conceived and designed this study. B.P. and Y.S. supervised  
817 and conceptualized this study. Y.H. performed most of the experiments and data  
818 analysis unless specified. Y.H. and Q.H. conducted EEG and EMG experiments. T.L.,  
819 W.K. and S.D. conducted patch clamp recordings. T.L. and Y.H. performed the spine  
820 analysis. X.L. performed RNAscope. B.P., Y.S., Y.R., Y.M., F.G., and W.L. provided  
821 necessary study support. All authors discussed the results and commented on this  
822 manuscript.

823

824

825 **Competing interests**

826 The authors declare no competing interests.

827 **Figures**

828



829

830 **Figure 1** Microglial depletion impedes anesthesia induction and accelerates emergence.

831 **(A)** Scheme of time points for microglial depletion and repopulation by PLX5622 and

832 CD.

833 **(B)** Mice exhibit delayed induction and early emergence in pentobarbital-, propofol-,

834 chloral hydrate- and ketamine-induced anesthesia. N = 11, 10, 10 and 12 mice for

835 pentobarbital, propofol, chloral hydrate and ketamine, respectively. Repeated measures

836 (paired) one-way ANOVA with Geisser-Greenhouse correction and Tukey's multiple

837 comparison test.

838 Data are presented as mean  $\pm$  SD. PLX5622: PLX5622-formulated diet; CD: control

839 diet; LORR: loss of righting reflex; RORR: recovery of righting reflex.

840



842 **Figure 2** Repetitive anesthetic treatment does not result in anesthesia tolerance.

843 **(A)** Scheme of time points for anesthetic treatments and righting reflex examination.

844 **(B)** Repetitive treatment with pentobarbital, propofol, chloral hydrate or ketamine does  
 845 not induce anesthesia tolerance in mice. N = 5, 7, 6 and 5 mice are treated with  
 846 pentobarbital, propofol, chloral hydrate and ketamine, respectively. Repeated measures  
 847 (paired) one-way ANOVA with Geisser-Greenhouse correction and Tukey's multiple  
 848 comparison test. LORR: loss of righting reflex; RORR: recovery of righting reflex.

849

850



851

852 **Figure 3** CSF1R inhibition-induced general anesthesia regulation is not due to the  
853 depletion of peripheral macrophages.

854 (A) Scheme of time points for peripheral macrophage depletion by PLX73086.

855 (B) CSF1R inhibition by PLX73086 dramatically ablates macrophages in the liver, lung,  
856 spleen and kidney and does not ablate brain microglia. N = 4 mice for each group. Two-  
857 tailed independent t test.

858 (C) Depletion of peripheral macrophages does not influence the anesthesia induction  
859 of pentobarbital, propofol, chloral hydrate and ketamine or the emergence from

860 propofol, chloral hydrate and ketamine. However, it impedes anesthesia emergence  
861 from pentobarbital. N = 9, 8, 8 and 9 mice for pentobarbital, propofol, chloral hydrate  
862 and ketamine, respectively. Two-tailed paired t test.

863 Data are presented as mean  $\pm$  SD. PLX73086: PLX73086-formulated diet; CD: control  
864 diet; LORR: loss of righting reflex; RORR: recovery of righting reflex.

865

866



867

868 **Figure 4** EEG and EMG recordings reveal that mice with microglial depletion are  
869 resistant to general anesthesia by pentobarbital.

870 **(A)** Scheme of time points for animal surgery, microglial depletion and EEG/EMG  
871 recording.

872 **(B-D)** Microglial depletion shows no obvious change in EEG before the injection of  
873 pentobarbital. Instead, it influences the EEG in anesthesia induction and emergence.  
874 Two-tailed paired t test. The gray area in D indicates  $P < 0.05$  between CD and  
875 PLX5622.

876 **(E)** Microglial depletion does not change the EMG before the injection of pentobarbital.  
877 Instead, it influences the EMG in the anesthesia process.

878 **(F)** Microglial depletion does not change the probability of consciousness before the

879 injection of pentobarbital. Instead, it influences the consciousness probability in the  
880 anesthesia process.

881 N = 9 mice for each group. Data are presented as mean  $\pm$  SD. RMS: root mean square;

882 A.U.: arbitrary unit; PLX5622: PLX5622-formulated diet.

883

884



885

886 **Figure 5** EEG and EMG recordings reveal that mice with microglial depletion are  
887 resistant to general anesthesia by propofol.

888 **(A)** Scheme of time points for animal surgery, microglial depletion and EEG/EMG  
889 recording.

890 **(B-D)** Microglial depletion does not change the EEG before the injection of propofol.  
891 Instead, it influences the EEG in anesthesia induction and emergence. Two-tailed paired  
892 t test. The gray area in D indicates  $P < 0.05$  between CD and PLX5622.

893 **(E)** Microglial depletion does not change the EMG before the injection of propofol.  
894 Instead, it influences the EMG in the anesthesia process.

895 **(F)** Microglial depletion does not change the probability of consciousness before the  
896 injection of propofol. Instead, it influences the consciousness probability in the

897 anesthesia process.

898 N = 5 mice for each group. Data are presented as mean  $\pm$  SD. RMS: root mean square;

899 A.U.: arbitrary unit; PLX5622: PLX5622-formulated diet.

900



901

902 **Figure 6** EEG and EMG recordings reveal that mice with microglial depletion are  
903 mouse resistant to general anesthesia by ketamine.

904 **(A)** Scheme of time points for animal surgery, microglial depletion and EEG/EMG  
905 recording.

906 **(B-D)** Microglial depletion does not change the EEG before the injection of ketamine.  
907 Instead, it influences the EEG in anesthesia induction and emergence. Two-tailed paired  
908 t test. The gray area in D indicates  $P < 0.05$  between CD and PLX5622.

909 **(E)** Microglial depletion does not change the EMG before the injection of ketamine.  
910 Instead, it influences the EMG in the anesthesia process.

911 **(F)** Microglial depletion does not change the probability of consciousness before the  
912 injection of ketamine. Instead, it influences the consciousness probability in the

913 anesthesia process.

914 N = 12 mice for each group. Data are presented as mean  $\pm$  SD. RMS: root mean square;

915 A.U.: arbitrary unit; PLX5622: PLX5622-formulated diet.

916

917



918

919 **Figure 7** Microglial depletion diversely influences neuronal activity in different  
920 anesthesia-related brain regions.

921 **(A)** Scheme of time points for microglial depletion and examination time points.

922 **(B)** Influence of microglial depletion in anesthesia-activated brain regions. Microglial  
923 depletion reduces neuronal activity in the LHb ( $P = 0.0356$ ), SON ( $P = 0.0203$ ) and  
924 VLPO ( $P = 0.1592$ ) and does not influence neuronal activity in the TRN ( $P = 0.9994$ ).  
925  $N = 12, 6, 9$  and  $12$  mice for LHb, SON, VLPO and TRN in the CD group, respectively.  
926  $N = 9, 5, 10$  and  $10$  mice for LHb, SON, VLPO and TRN in the PLX5622 group,  
927 respectively.

928 **(C)** Influence of microglial depletion in emergence-activated brain regions. Microglial  
929 depletion enhances neuronal activity in the PVT ( $P = 0.0298$ ), LC ( $P = 0.0053$ ), LH ( $P$   
930  $= 0.0598$ ) and VTA ( $P = 0.1436$ ).  $N = 12, 6, 12$  and  $12$  mice for PVT, LC, LH and VTA  
931 in the CD group, respectively.  $N = 9, 5, 10$  and  $11$  mice for PVT, LC, LH and VTA in  
932 the PLX5622 group, respectively.

933 Two-tailed independent t test. Data are presented as mean  $\pm$  SD. PLX5622: PLX5622-  
934 formulated diet; CD: control diet; LHb: lateral habenula; SON: supraoptic nucleus;

935 VLPO: ventrolateral preoptic nucleus; TRN: thalamic reticular nucleus; PVT:  
936 paraventricular thalamus; LC: locus coeruleus; LH: lateral hypothalamus; VTA: ventral  
937 tegmental area.  
938



939

940 **Figure 8** Animal handling and intraperitoneal injection do not influence neuronal  
 941 activity in anesthesia-related brain regions.

942 **(A)** Scheme of time points for microglial depletion and examination time points.

943 **(B)** Microglial depletion does not influence neuronal activity in the LHb, SON, VLPO  
 944 or TRN. N = 5, 4, 5 and 4 mice for LHb, SON, VLPO and TRN in the CD group,  
 945 respectively. N = 5, 4, 5 and 4 mice for LHb, SON, VLPO and TRN in the PLX5622  
 946 group, respectively.

947 **(C)** Microglial depletion does not influence neuronal activity in the PVT, LC, LH or  
 948 VTA. N = 5, 4, 5 and 5 mice for PVT, LC, LH and VTA in the CD group, respectively.

949 N = 5, 5, 5 and 5 mice for PVT, LC, LH and VTA in the PLX5622 group, respectively.

950 Two-tailed independent t test. Data are presented as mean  $\pm$  SD. PLX5622: PLX5622-

951 formulated diet; CD: control diet; LHb: lateral habenula; SON: supraoptic nucleus;

952 VLPO: ventrolateral preoptic nucleus; TRN: thalamic reticular nucleus; PVT:

953 paraventricular thalamus; LC: locus coeruleus; LH: lateral hypothalamus; VTA: ventral

954 tegmental area.



**Figure 9** c-Fos protein and *Fos* mRNA dual staining dissects the influence of microglial depletion on consciousness and anesthesia states.

(A) Scheme of time points for microglial depletion and dual labeling.

(B-C) The influence of microglial depletion on activated neurons in consciousness and anesthesia states in AABRs (LHb and SON) and EABRs (PVT and LC). N = 5 (LHb CD), 6 (LHb PLX5622), 5 (SON CD), 6 (SON PLX5622), 5 (PVT CD), 6 (PVT PLX5622), 5 (LC CD) and 5 (LC PLX5622) mice for each group.

Two-tailed independent t test. Data are presented as mean  $\pm$  SD. PLX5622: PLX5622-formulated diet; CD: control diet; LHb: lateral habenula; SON: supraoptic nucleus; PVT: paraventricular thalamus; LC: locus coeruleus.



968

969 **Figure 10** Microglial depletion reduces the E/I ratio in SON but enhances the E/I ratio  
 970 in LC.

971 **(A)** Scheme of time points for microglial depletion by PLX5622.

972 **(B)** Representative traces for evoked postsynaptic currents in the SON to 10 increasing  
 973 stimulation currents.

974 **(C)** Amplitudes of evoked postsynaptic currents in the SON in response to increasing  
 975 electrical stimulation intensities. Two-way ANOVA. Data are presented as mean  $\pm$  SEM.

976 **(D)** E/I ratios with different stimulation intensities in the SON. N = 21 cells from 5 mice  
 977 for each group. Two-way ANOVA. Data are presented as mean  $\pm$  SEM.

978 **(E)** Representative traces (left) and quantitative results (right) show that PLX5622-  
 979 treated mice exhibited a higher eEPSC PPR in SON. N = 24 (CD) and 30 (PLX5622)

980 cells from 5 mice for each group. Two-tailed independent t test. Data are presented as  
981 mean  $\pm$  SD.

982 **(F)** Representative traces (left) and quantitative results (right) show that PLX5622-  
983 treated mice exhibited a similar eIPSC PPR in SON. N = 29 (CD) and 30 (PLX5622)  
984 cells from 5 mice for each group. Two-tailed independent t test. Data are presented as  
985 mean  $\pm$  SD.

986 **(G)** Representative traces for evoked postsynaptic currents in the LC in response to 10  
987 increasing stimulation currents.

988 **(H)** Amplitudes of evoked postsynaptic currents in the LC in response to increasing  
989 electrical stimulation intensities. in response to the electrical stimulation. N = 15 (EPSC  
990 CD), 18 (EPSC PLX5622), 15 (IPSC CD) and 18 (IPSC PLX5622) cells from 5 mice  
991 for each group. Two-way ANOVA. Data are presented as mean  $\pm$  SEM.

992 **(I)** E/I ratios with different stimulation currents in the LC. N = 15 (EPSC CD), 18  
993 (EPSC PLX5622), 15 (IPSC CD) and 18 (IPSC PLX5622) cells from 5 mice for each  
994 group. Two-way ANOVA. Data are presented as mean  $\pm$  SEM.

995 **(J)** Representative traces (left) and quantitative results (right) show that PLX5622-  
996 treated mice exhibited a similar eEPSC PPR in the LC. N = 14 (CD) and 16 (PLX5622)  
997 cells from 5 mice for each group. Two-tailed independent t test. Data are presented as  
998 mean  $\pm$  SD.

999 **(K)** Representative traces (left) and quantitative results (right) show that PLX5622-  
1000 treated mice exhibited a similar eIPSC PPR in the LC. N = 13 (CD) and 14 (PLX5622)  
1001 cells from 5 mice for each group. Two-tailed independent t test. Data are presented as  
1002 mean  $\pm$  SD.

1003 PLX5622: PLX5622-formulated diet; CD: control diet. eEPSC: evoked excitatory  
1004 postsynaptic current; eIPSC: evoked inhibitory postsynaptic current.

1005

1006

1007



1008

1009 **Figure 11** Interruption of the spine “eat me” signal by C1qa<sup>-/-</sup> does not influence the  
 1010 anesthesia process and microglial depletion alters the proportion of spine categories.

1011 **(A)** Scheme of time points for microglial depletion and examination time points.

1012 **(B)** CSF1R inhibition for 14 days does not influence spine density but changes the  
 1013 proportion of spine subtypes. N = 18 and 13 cells from 5 mice for each group of apical  
 1014 spines, N = 24 and 19 cells from 5 mice for each group of basal spines.

1015 **(C)** Scheme of LORR and RORR tests in wild-type and C1qa<sup>-/-</sup> mice.

1016 **(D)** C1q knockout does not influence anesthesia induction and emergence in response  
 1017 to pentobarbital, propofol and ketamine. N = 6 (pentobarbital WT), 9 (pentobarbital  
 1018 C1qa<sup>-/-</sup>), 5 (propofol WT), 9 (propofol C1qa<sup>-/-</sup>), 9 (ketamine WT) and 8 (ketamine  
 1019 C1qa<sup>-/-</sup>).

1020 Two-tailed independent t test. Data are presented as mean  $\pm$  SD. PLX5622: PLX5622-  
1021 formulated diet; CD: control diet; LORR: loss of righting reflex; RORR: recovery of  
1022 righting reflex.



1023

1024 **Figure 12** Microglial P2Y12 regulates the induction and emergence of anesthesia.

1025 (A) Scheme of 2-MeSAMP administration and behavior tests for anesthesia.

1026 (B) P2Y12 inhibition by 2-MeSAMP drives microglia to a more reactive state. N = 4

1027 mice for each group.

1028 **(C)** P2Y12 inhibition by 2-MeSAMP results in delayed anesthesia induction and early  
1029 emergence. N = 8 mice for each group.

1030 **(D)** Scheme of animal treatment and examination time points for CX3CR1<sup>+/-CreER</sup> and  
1031 CX3CR1<sup>+/-CreER</sup>::P2Y12<sup>fl/fl</sup> mice.

1032 **(E)** Tamoxifen induces efficient P2Y12 knockout in CX3CR1<sup>+/-CreER</sup>::P2Y12<sup>fl/fl</sup> mice. N  
1033 = 7 mice for the CX3CR1<sup>+/-CreER</sup> group and 4 mice for the CX3CR1<sup>+/-CreER</sup>::P2Y12<sup>fl/fl</sup>  
1034 group.

1035 **(F)** Efficient knockout of P2Y12 significantly elongates the LORR and shortens the  
1036 RORR. N = 14 mice for the CX3CR1<sup>+/-CreER</sup> group and 15 mice for the  
1037 CX3CR1<sup>+/-CreER</sup>::P2Y12<sup>fl/fl</sup> group.

1038 **(G)** Scheme of animal treatment and examination time points for TMEM119<sup>CreER/CreER</sup>  
1039 and TMEM119<sup>CreER/CreER</sup>::P2Y12<sup>fl/fl</sup> mice.

1040 **(H)** Tamoxifen induces relatively low efficiency of P2Y12 knockout in  
1041 TMEM119<sup>CreER/CreER</sup>::P2Y12<sup>fl/fl</sup> mice. N = 5 mice for the TMEM119<sup>CreER/CreER</sup> group  
1042 and 3 mice for the TMEM119<sup>CreER/CreER</sup>::P2Y12<sup>fl/fl</sup> group.

1043 **(I)** Low-efficiency knockout of P2Y12 does not affect anesthesia induction but  
1044 significantly shortens the emergence time. N = 9 mice for the TMEM119<sup>CreER/CreER</sup>  
1045 group and 11 mice for the TMEM119<sup>CreER/CreER</sup>::P2Y12<sup>fl/fl</sup> group.

1046 Two-tailed independent t test. Data are presented as mean ± SD. ICV:  
1047 intracerebroventricular; OG: oral gavage; LORR: loss of righting reflex; RORR:  
1048 recovery of righting reflex.

1049

1050



1051

1052 **Figure 13** Mice with P2Y12<sup>-</sup> Mr BMT cells display delayed anesthesia induction and  
 1053 early emergence.

1054 **(A)** Scheme of microglia replacement by Mr BMT and behavior tests for anesthesia.

1055 **(B)** Mr BMT cells exhibit a P2Y12<sup>-</sup> phenotype. N = 6 mice for each group.

1056 **(C)** P2Y12<sup>-</sup> microglia lead to delayed anesthesia induction and early emergence. N = 6  
 1057 mice for the control group, 6 mice for the Mr BMT (IRR) group and 6 mice for the Mr  
 1058 BMT (BU) group.

1059 Two-tailed independent t test. Data are presented as mean  $\pm$  SD. IP: intraperitoneal  
 1060 injection; Mr BMT: microglia replacement by bone marrow transplantation; BMT: bone  
 1061 marrow transplantation; Ctrl: control; IRR: irradiation; BU: busulfan; LORR: loss of  
 1062 righting reflex; RORR: recovery of righting reflex.

1063



1064

1065 **Figure 14** General anesthesia is regulated by intracellular calcium in microglia.

1066 **(A)** Scheme of animal treatment and examination time points for CX3CR1<sup>+/CreER</sup> and  
1067 CX3CR1<sup>+/CreER::hM3Dq-YFP<sup>+/-</sup></sup> mice.

1068 **(B)** Tamoxifen induces high Cre-dependent recombination in CX3CR1<sup>+/CreER::hM3Dq-</sup>  
1069 YFP<sup>+/-</sup> mice. N = 5 mice for the vehicle group and 6 mice for the tamoxifen group.

1070 **(C)** Elevation of microglial intracellular Ca<sup>2+</sup> results in a shorter anesthesia induction  
1071 time and longer emergence time. N = 13 (LORR CX3CR1<sup>+/CreER</sup>), 14 (LORR  
1072 CX3CR1<sup>+/CreER::hM3Dq-YFP<sup>+/-</sup></sup>), 12 (RORR CX3CR1<sup>+/CreER</sup>) and 11 (RORR  
1073 CX3CR1<sup>+/CreER::hM3Dq-YFP<sup>+/-</sup></sup>) mice per group.

1074 **(D)** Scheme of animal treatment and examination time points for CX3CR1<sup>+/CreER</sup> and  
1075 CX3CR1<sup>+/CreER::STIM1<sup>fl/fl</sup></sup> mice.

1076 **(E)** qPCR results reveal decreased *Stim1* transcription in CX3CR1<sup>+CreER</sup>::STIM1<sup>fl/fl</sup>  
1077 mouse brains. N = 6 mice for the CX3CR1<sup>+CreER</sup> group and 5 mice for the  
1078 CX3CR1<sup>+CreER</sup>::STIM1<sup>fl/fl</sup> group.

1079 **(F)** Downregulation of microglial intracellular Ca<sup>2+</sup> results in longer anesthesia  
1080 induction time and shorter emergence time. N = 7 CX3CR1<sup>+CreER</sup> and 5  
1081 CX3CR1<sup>+CreER</sup>::STIM1<sup>fl/fl</sup> mice per group.

1082 Two-tailed independent t test. Data are presented as mean ± SD. OG: oral gavage; IP:  
1083 intraperitoneal injection; TAM: tamoxifen; LORR: loss of righting reflex; RORR:  
1084 recovery of righting reflex.

1085

## 1086 References

- 1087 1. F. Ginhoux *et al.*, Fate mapping analysis reveals that adult microglia derive from primitive  
1088 macrophages. *Science* **330**, 841-845 (2010).
- 1089 2. S. Brioschi, Y. Zhou, M. Colonna, Brain Parenchymal and Extraparenchymal Macrophages in  
1090 Development, Homeostasis, and Disease. *Journal of immunology* **204**, 294-305 (2020).
- 1091 3. M. Prinz, S. Jung, J. Priller, Microglia Biology: One Century of Evolving Concepts. *Cell* **179**,  
1092 292-311 (2019).
- 1093 4. Y. U. Liu *et al.*, Neuronal network activity controls microglial process surveillance in awake  
1094 mice via norepinephrine signaling. *Nature neuroscience* 10.1038/s41593-019-0511-3 (2019).
- 1095 5. R. D. Stowell *et al.*, Noradrenergic signaling in the wakeful state inhibits microglial surveillance  
1096 and synaptic plasticity in the mouse visual cortex. *Nature neuroscience* 10.1038/s41593-019-  
1097 0514-0 (2019).
- 1098 6. A. D. Umpierre *et al.*, Microglial calcium signaling is attuned to neuronal activity in awake  
1099 mice. *Elife* **9**, e56502 (2020).
- 1100 7. G. O. Sipe *et al.*, Microglial P2Y<sub>12</sub> is necessary for synaptic plasticity in mouse visual cortex.  
1101 *Nature communications* **7**, 10905 (2016).
- 1102 8. B. Stevens *et al.*, The classical complement cascade mediates CNS synapse elimination. *Cell*  
1103 **131**, 1164-1178 (2007).
- 1104 9. E. Favuzzi *et al.*, GABA-receptive microglia selectively sculpt developing inhibitory circuits.  
1105 *Cell* 10.1016/j.cell.2021.06.018 (2021).
- 1106 10. D. P. Schafer *et al.*, Microglia sculpt postnatal neural circuits in an activity and complement-  
1107 dependent manner. *Neuron* **74**, 691-705 (2012).
- 1108 11. U. B. Eyo, M. Murugan, L. J. Wu, Microglia-Neuron Communication in Epilepsy. *Glia* **65**, 5-  
1109 18 (2017).
- 1110 12. A. Badimon *et al.*, Negative feedback control of neuronal activity by microglia. *Nature*  
1111 10.1038/s41586-020-2777-8 (2020).
- 1112 13. B. Erblich, L. Zhu, A. M. Etgen, K. Dobrenis, J. W. Pollard, Absence of colony stimulation  
1113 factor-1 receptor results in loss of microglia, disrupted brain development and olfactory deficits.  
1114 *PLoS One* **6**, e26317 (2011).
- 1115 14. M. R. Elmore, R. J. Lee, B. L. West, K. N. Green, Characterizing newly repopulated microglia  
1116 in the adult mouse: impacts on animal behavior, cell morphology, and neuroinflammation. *PLoS*  
1117 *One* **10**, e0122912 (2015).
- 1118 15. Y. Huang *et al.*, Dual extra-retinal origins of microglia in the model of retinal microglia  
1119 repopulation. *Cell Discov* **4**, 9 (2018).
- 1120 16. T. Zhou *et al.*, Microglial debris is cleared by astrocytes via C4b-facilitated phagocytosis and  
1121 degraded via RUBICON-dependent noncanonical autophagy in mice. *Nature communications*  
1122 **13**, 6233 (2022).
- 1123 17. Y. Rao *et al.*, NeuroD1 induces microglial apoptosis and cannot induce microglia-to-neuron  
1124 cross-lineage reprogramming. *Neuron* **109**, 4094-4108.e4095 (2021).
- 1125 18. Z. Xu *et al.*, Efficient strategies for microglia replacement in the central nervous system. *Cell*  
1126 *reports* **32**, 108041 (2020).
- 1127 19. Y. Huang *et al.*, Repopulated microglia are solely derived from the proliferation of residual  
1128 microglia after acute depletion. *Nature neuroscience* **21**, 530-540 (2018).

- 1129 20. M. R. Elmore *et al.*, Colony-stimulating factor 1 receptor signaling is necessary for microglia  
1130 viability, unmasking a microglia progenitor cell in the adult brain. *Neuron* **82**, 380-397 (2014).
- 1131 21. C. N. Parkhurst *et al.*, Microglia promote learning-dependent synapse formation through brain-  
1132 derived neurotrophic factor. *Cell* **155**, 1596-1609 (2013).
- 1133 22. E. Spangenberg *et al.*, Sustained microglial depletion with CSF1R inhibitor impairs  
1134 parenchymal plaque development in an Alzheimer's disease model. *Nature communications* **10**,  
1135 3758 (2019).
- 1136 23. P. Jiang *et al.*, Nucleotide transmitters ATP and ADP mediate intercellular calcium wave  
1137 communication via P2Y12/13 receptors among BV-2 microglia. *PLoS One* **12**, e0183114 (2017).
- 1138 24. A. Jairaman *et al.*, TREM2 regulates purinergic receptor-mediated calcium signaling and  
1139 motility in human iPSC-derived microglia. *Elife* **11** (2022).
- 1140 25. A. Pozner *et al.*, Intracellular calcium dynamics in cortical microglia responding to focal laser  
1141 injury in the PC::G5-tdT reporter mouse. *Frontiers in molecular neuroscience* **8**, 12 (2015).
- 1142 26. K. Cao *et al.*, Microglia modulate general anesthesia through P2Y12 receptor. *Curr Biol*  
1143 10.1016/j.cub.2023.04.047 (2023).
- 1144 27. X. Yang *et al.*, CSF1R blockade induces macrophage ablation and results in mouse choroidal  
1145 vascular atrophy and RPE disorganization. *Elife* **9**, e55564 (2020).
- 1146 28. T. C. Sykes, A. M. Thomson, Sodium pentobarbitone enhances responses of thalamic relay  
1147 neurones to GABA in rat brain slices. *Br J Pharmacol* **97**, 1059-1066 (1989).
- 1148 29. P. S. Sebel, J. D. Lowdon, Propofol: a new intravenous anesthetic. *Anesthesiology* **71**, 260-277  
1149 (1989).
- 1150 30. D. M. Lovinger, S. A. Zimmerman, M. Levitin, M. V. Jones, N. L. Harrison, Trichloroethanol  
1151 potentiates synaptic transmission mediated by gamma-aminobutyric acidA receptors in  
1152 hippocampal neurons. *Journal of Pharmacology and Experimental Therapeutics* **264**, 1097-  
1153 1103 (1993).
- 1154 31. K. M. Garrett, J. Gan, Enhancement of gamma-aminobutyric acidA receptor activity by alpha-  
1155 chloralose. *J Pharmacol Exp Ther* **285**, 680-686 (1998).
- 1156 32. N. A. Anis, S. C. Berry, N. R. Burton, D. Lodge, The dissociative anaesthetics, ketamine and  
1157 phencyclidine, selectively reduce excitation of central mammalian neurones by N-methyl-  
1158 aspartate. *Br J Pharmacol* **79**, 565-575 (1983).
- 1159 33. V. Bellver-Landete *et al.*, Microglia are an essential component of the neuroprotective scar that  
1160 forms after spinal cord injury. *Nature communications* **10**, 518 (2019).
- 1161 34. Q. Zhai *et al.*, Reducing complement activation during sleep deprivation yields cognitive  
1162 improvement by dexmedetomidine. *Br J Anaesth* 10.1016/j.bja.2023.04.044 (2023).
- 1163 35. C. Gelegen *et al.*, Excitatory Pathways from the Lateral Habenula Enable Propofol-Induced  
1164 Sedation. *Curr Biol* **28**, 580-587 e585 (2018).
- 1165 36. F. Zhou *et al.*, Orexinergic innervations at GABAergic neurons of the lateral habenula mediates  
1166 the anesthetic potency of sevoflurane. *CNS Neurosci Ther* **29**, 1332-1344 (2023).
- 1167 37. L. F. Jiang-Xie *et al.*, A Common Neuroendocrine Substrate for Diverse General Anesthetics  
1168 and Sleep. *Neuron* **102**, 1053-1065 e1054 (2019).
- 1169 38. L. E. Nelson *et al.*, The sedative component of anesthesia is mediated by GABA(A) receptors  
1170 in an endogenous sleep pathway. *Nature neuroscience* **5**, 979-984 (2002).
- 1171 39. Y. Zhang *et al.*, Activation of noradrenergic terminals in the reticular thalamus delays arousal  
1172 from propofol anesthesia in mice. *FASEB journal : official publication of the Federation of*

- 1173 *American Societies for Experimental Biology* **33**, 7252-7260 (2019).
- 1174 40. Y. L. Wang *et al.*, Paraventricular thalamus controls consciousness transitions during propofol  
1175 anaesthesia in mice. *Br J Anaesth* **130**, 698-708 (2023).
- 1176 41. E. M. Vazey, G. Aston-Jones, Designer receptor manipulations reveal a role of the locus  
1177 coeruleus noradrenergic system in isoflurane general anesthesia. *Proceedings of the National*  
1178 *Academy of Sciences of the United States of America* **111**, 3859-3864 (2014).
- 1179 42. A. Venner, C. Anaclet, R. Y. Broadhurst, C. B. Saper, P. M. Fuller, A Novel Population of Wake-  
1180 Promoting GABAergic Neurons in the Ventral Lateral Hypothalamus. *Curr Biol* **26**, 2137-2143  
1181 (2016).
- 1182 43. S. Zhao *et al.*, Lateral Hypothalamic Area Glutamatergic Neurons and Their Projections to the  
1183 Lateral Habenula Modulate the Anesthetic Potency of Isoflurane in Mice. *Neuroscience bulletin*  
1184 **37**, 934-946 (2021).
- 1185 44. K. Solt *et al.*, Electrical stimulation of the ventral tegmental area induces reanimation from  
1186 general anesthesia. *Anesthesiology* **121**, 311-319 (2014).
- 1187 45. N. E. Taylor, J. J. Chemali, E. N. Brown, K. Solt, Activation of D1 dopamine receptors induces  
1188 emergence from isoflurane general anesthesia. *Anesthesiology* **118**, 30-39 (2013).
- 1189 46. J. Xiu *et al.*, Visualizing an emotional valence map in the limbic forebrain by TAI-FISH. *Nature*  
1190 *neuroscience* **17**, 1552-1559 (2014).
- 1191 47. H. Lui *et al.*, Progranulin Deficiency Promotes Circuit-Specific Synaptic Pruning by Microglia  
1192 via Complement Activation. *Cell* **165**, 921-935 (2016).
- 1193 48. R. C. Paolicelli *et al.*, Synaptic pruning by microglia is necessary for normal brain development.  
1194 *Science* **333**, 1456-1458 (2011).
- 1195 49. S. Rivest, A 'don't eat me' immune signal protects neuronal connections. *Nature* **563**, 42-43  
1196 (2018).
- 1197 50. Y. Ma, A. Ramachandran, N. Ford, I. Parada, D. A. Prince, Remodeling of dendrites and spines  
1198 in the C1q knockout model of genetic epilepsy. *Epilepsia* **54**, 1232-1239 (2013).
- 1199 51. S. Srinivasan *et al.*, The P2Y12 antagonists, 2-methylthioadenosine 5'-monophosphate  
1200 triethylammonium salt and cangrelor (ARC69931MX), can inhibit human platelet aggregation  
1201 through a Gi-independent increase in cAMP levels. *The Journal of biological chemistry* **284**,  
1202 16108-16117 (2009).
- 1203 52. P. Mastorakos *et al.*, Temporally distinct myeloid cell responses mediate damage and repair after  
1204 cerebrovascular injury. *Nat Neurosci* **24**, 245-258 (2021).
- 1205 53. A. Bedolla *et al.*, Finding the right tool: a comprehensive evaluation of microglial inducible cre  
1206 mouse models. *bioRxiv* 10.1101/2023.04.17.536878, 2023.2004.2017.536878 (2023).
- 1207 54. T. E. Faust *et al.*, A comparative analysis of microglial inducible Cre lines. *bioRxiv*  
1208 10.1101/2023.01.09.523268 (2023).
- 1209 55. Z. Xu, X. Zhou, B. Peng, Y. Rao, Microglia replacement by bone marrow transplantation (Mr  
1210 BMT) in the central nervous system of adult mice. *STAR Protoc* **2**, 100666 (2021).
- 1211 56. B. L. Roth, DREADDs for Neuroscientists. *Neuron* **89**, 683-694 (2016).
- 1212 57. D. J. Urban, B. L. Roth, DREADDs (designer receptors exclusively activated by designer drugs):  
1213 chemogenetic tools with therapeutic utility. *Annual review of pharmacology and toxicology* **55**,  
1214 399-417 (2015).
- 1215 58. M. Oh-Hora *et al.*, Dual functions for the endoplasmic reticulum calcium sensors STIM1 and  
1216 STIM2 in T cell activation and tolerance. *Nature immunology* **9**, 432-443 (2008).

- 1217 59. S. L. Zhang *et al.*, STIM1 is a Ca<sup>2+</sup> sensor that activates CRAC channels and migrates from  
1218 the Ca<sup>2+</sup> store to the plasma membrane. *Nature* **437**, 902-905 (2005).
- 1219 60. J. Stiber *et al.*, STIM1 signalling controls store-operated calcium entry required for  
1220 development and contractile function in skeletal muscle. *Nature cell biology* **10**, 688-697 (2008).
- 1221 61. F. Loggiacco *et al.*, Microglia sense neuronal activity via GABA in the early postnatal  
1222 hippocampus. *Cell reports* **37**, 110128 (2021).
- 1223 62. L. Dissing-Olesen *et al.*, Activation of neuronal NMDA receptors triggers transient ATP-  
1224 mediated microglial process outgrowth. *J Neurosci* **34**, 10511-10527 (2014).
- 1225 63. Q. Bi *et al.*, Microglia-derived PDGFB promotes neuronal potassium currents to suppress basal  
1226 sympathetic tonic and limit hypertension. *Immunity* **55**, 1466-1482 e1469 (2022).
- 1227 64. A. M. Klawonn *et al.*, Microglial activation elicits a negative affective state through  
1228 prostaglandin-mediated modulation of striatal neurons. *Immunity* **54**, 225-234.e226 (2021).
- 1229 65. Q. Li *et al.*, Developmental Heterogeneity of Microglia and Brain Myeloid Cells Revealed by  
1230 Deep Single-Cell RNA Sequencing. *Neuron* **101**, 207-223.e210 (2019).
- 1231 66. E. Császár *et al.*, Microglia modulate blood flow, neurovascular coupling, and hypoperfusion  
1232 via purinergic actions. *J Exp Med* **219** (2022).
- 1233 67. A. Badimon *et al.*, Negative feedback control of neuronal activity by microglia. *Nature* **586**,  
1234 417-423 (2020).
- 1235 68. Y. J. Liu *et al.*, Research progress on adenosine in central nervous system diseases. *CNS*  
1236 *Neurosci Ther* **25**, 899-910 (2019).
- 1237 69. C. Wang *et al.*, Microglia mediate forgetting via complement-dependent synaptic elimination.  
1238 *Science* **367**, 688-694 (2020).
- 1239 70. Y. Chu *et al.*, Enhanced synaptic connectivity and epilepsy in C1q knockout mice. *Proc Natl*  
1240 *Acad Sci U S A* **107**, 7975-7980 (2010).
- 1241 71. M. Alves *et al.*, Expression and function of the metabotropic purinergic P2Y receptor family in  
1242 experimental seizure models and patients with drug-refractory epilepsy. *Epilepsia* **58**, 1603-  
1243 1614 (2017).
- 1244 72. M. Mo *et al.*, Microglial P2Y<sub>12</sub> Receptor Regulates Seizure-Induced Neurogenesis and  
1245 Immature Neuronal Projections. *J Neurosci* **39**, 9453-9464 (2019).
- 1246 73. L. van Olst *et al.*, Meningeal inflammation in multiple sclerosis induces phenotypic changes in  
1247 cortical microglia that differentially associate with neurodegeneration. *Acta Neuropathol* **141**,  
1248 881-899 (2021).
- 1249 74. Z. Xu, Y. Rao, B. Peng, Protocol for microglia replacement by peripheral blood (Mr PB). *STAR*  
1250 *Protoc* **2**, 100613 (2021).
- 1251 75. Z. Xu, B. Peng, Y. Rao, Microglia replacement by microglia transplantation (Mr MT) in the  
1252 adult mouse brain. *STAR Protoc* **2**, 100665 (2021).
- 1253 76. J. C. Lambert *et al.*, Meta-analysis of 74,046 individuals identifies 11 new susceptibility loci  
1254 for Alzheimer's disease. *Nature genetics* **45**, 1452-1458 (2013).
- 1255 77. T. Jonsson *et al.*, Variant of TREM2 associated with the risk of Alzheimer's disease. *N Engl J*  
1256 *Med* **368**, 107-116 (2013).
- 1257 78. R. Guerreiro *et al.*, TREM2 variants in Alzheimer's disease. *N Engl J Med* **368**, 117-127 (2013).
- 1258 79. P. Yuan *et al.*, TREM2 Haplodeficiency in Mice and Humans Impairs the Microglia Barrier  
1259 Function Leading to Decreased Amyloid Compaction and Severe Axonal Dystrophy. *Neuron*  
1260 **92**, 252-264 (2016).

- 1261 80. C. E. G. Leyns *et al.*, TREM2 function impedes tau seeding in neuritic plaques. *Nature*  
1262 *neuroscience* 10.1038/s41593-019-0433-0 (2019).
- 1263 81. L. Zhong *et al.*, Soluble TREM2 ameliorates pathological phenotypes by modulating microglial  
1264 functions in an Alzheimer's disease model. *Nature communications* **10**, 1365 (2019).
- 1265 82. S. Parhizkar *et al.*, Loss of TREM2 function increases amyloid seeding but reduces plaque-  
1266 associated ApoE. *Nature neuroscience* 10.1038/s41593-018-0296-9 (2019).
- 1267 83. F. L. Yeh, Y. Wang, I. Tom, L. C. Gonzalez, M. Sheng, TREM2 Binds to Apolipoproteins,  
1268 Including APOE and CLU/APOJ, and Thereby Facilitates Uptake of Amyloid-Beta by  
1269 Microglia. *Neuron* **91**, 328-340 (2016).
- 1270 84. Y. Wang *et al.*, TREM2 lipid sensing sustains the microglial response in an Alzheimer's disease  
1271 model. *Cell* **160**, 1061-1071 (2015).
- 1272 85. Y. Rao, B. Peng, Allogenic microglia replacement: A novel therapeutic strategy for neurological  
1273 disorders. *Fundamental Research* 10.1016/j.fmre.2023.02.025 (2023).
- 1274 86. L. Zhang, Y. Wang, T. Liu, Y. Mao, B. Peng, Novel Microglia-based Therapeutic Approaches to  
1275 Neurodegenerative Disorders. *Neuroscience bulletin* **39**, 491-502 (2023).
- 1276 87. Y. Yoo, G. Neumayer, Y. Shibuya, M. Marc-Daniel Mader, M. Wernig, A cell therapy approach  
1277 to restore microglial Trem2 function in a mouse model of Alzheimer's disease. *Cell stem cell*  
1278 **30**, 1043-1053.e1046 (2023).
- 1279 88. P. Jiang, M. Jin, Replacing microglia to treat Alzheimer's disease. *Cell stem cell* **30**, 1001-1003  
1280 (2023).
- 1281 89. Y. Shibuya *et al.*, Treatment of a genetic brain disease by CNS-wide microglia replacement.  
1282 *Science translational medicine* **14**, eabl9945 (2022).
- 1283 90. H. Harz, P. Hegemann, Rhodopsin-regulated calcium currents in Chlamydomonas. *Nature* **351**,  
1284 489-491 (1991).
- 1285 91. A. Bi *et al.*, Ectopic expression of a microbial-type rhodopsin restores visual responses in mice  
1286 with photoreceptor degeneration. *Neuron* **50**, 23-33 (2006).
- 1287 92. E. S. Boyden, F. Zhang, E. Bamberg, G. Nagel, K. Deisseroth, Millisecond-timescale,  
1288 genetically targeted optical control of neural activity. *Nature neuroscience* **8**, 1263-1268 (2005).
- 1289 93. F. Zhang *et al.*, Multimodal fast optical interrogation of neural circuitry. *Nature* **446**, 633-639  
1290 (2007).
- 1291 94. G. M. Alexander *et al.*, Remote Control of Neuronal Activity in Transgenic Mice Expressing  
1292 Evolved G Protein-Coupled Receptors. *Neuron* **63**, 27-39 (2009).
- 1293 95. H. Zhu *et al.*, Chemogenetic Inactivation of Ventral Hippocampal Glutamatergic Neurons  
1294 Disrupts Consolidation of Contextual Fear Memory. *Neuropsychopharmacology : official*  
1295 *publication of the American College of Neuropsychopharmacology* **39**, 1880-1892 (2014).
- 1296 96. T. Kaiser, G. Feng, Tmem119-EGFP and Tmem119-CreERT2 Transgenic Mice for Labeling  
1297 and Manipulating Microglia. *eNeuro* **6** (2019).
- 1298 97. S. Yona *et al.*, Fate mapping reveals origins and dynamics of monocytes and tissue macrophages  
1299 under homeostasis. *Immunity* **38**, 79-91 (2013).
- 1300 98. M. I. Fonseca *et al.*, Cell-specific deletion of C1qa identifies microglia as the dominant source  
1301 of C1q in mouse brain. *Journal of neuroinflammation* **14**, 48 (2017).
- 1302 99. M. Okabe, M. Ikawa, K. Kominami, T. Nakanishi, Y. Nishimune, 'Green mice' as a source of  
1303 ubiquitous green cells. *FEBS letters* **407**, 313-319 (1997).
- 1304 100. H. Zhu *et al.*, Cre-dependent DREADD (Designer Receptors Exclusively Activated by Designer

- 1305 Drugs) mice. *Genesis* **54**, 439-446 (2016).
- 1306 101. Y. Shi *et al.*, Microglia drive APOE-dependent neurodegeneration in a tauopathy mouse model.  
1307 *J Exp Med* **216**, 2546-2561 (2019).
- 1308 102. W. Binning *et al.*, Chronic hM3Dq signaling in microglia ameliorates neuroinflammation in  
1309 male mice. *Brain Behav Immun* **88**, 791-801 (2020).
- 1310 103. S. L. DeVos, T. M. Miller, Direct intraventricular delivery of drugs to the rodent central nervous  
1311 system. *J Vis Exp* 10.3791/50326, e50326 (2013).
- 1312 104. J. J. Glascock *et al.*, Delivery of therapeutic agents through intracerebroventricular (ICV) and  
1313 intravenous (IV) injection in mice. *J Vis Exp* 10.3791/2968 (2011).
- 1314 105. J. Y. Zhang *et al.*, Chronic Stress Remodels Synapses in an Amygdala Circuit-Specific Manner.  
1315 *Biol Psychiatry* **85**, 189-201 (2019).
- 1316 106. F. Niu *et al.*, The m6A reader YTHDF2 is a negative regulator for dendrite development and  
1317 maintenance of retinal ganglion cells. *Elife* **11**, e75827 (2022).
- 1318
